# Lineage-mosaic and mutation-patched spike proteins for broad-spectrum COVID-19 vaccine

Authors: Yangtao Wu<sup>1†</sup>, Shaojuan Wang<sup>1†</sup>, Yali Zhang<sup>1†</sup>, Lunzhi Yuan<sup>1†</sup>, Qingbing Zheng<sup>1†</sup>, Min Wei<sup>1†</sup>, Yang Shi<sup>1†</sup>, Zikang Wang<sup>1</sup>, Jian Ma<sup>1</sup>, Kai Wang<sup>1</sup>, Meifeng Nie<sup>1</sup>, Jin Xiao<sup>1</sup>, Zehong Huang<sup>1</sup>, Peiwen Chen<sup>2,3,4</sup>, Huilin Guo<sup>1</sup>, Miaolin Lan<sup>1</sup>, Jingjing Xu<sup>1</sup>, Wangheng Hou<sup>1</sup>, Yunda Hong<sup>1</sup>, Dabing Chen<sup>1</sup>, Hui Sun<sup>1</sup>, Hualong Xiong<sup>1</sup>, Ming Zhou<sup>1</sup>, Che Liu<sup>1</sup>, Wenjie Guo<sup>1</sup>, Huiyu Guo<sup>1</sup>, Jiahua Gao<sup>1</sup>, Zhixiong Li<sup>5</sup>, Haitao Zhang<sup>5</sup>, Xinrui Wang<sup>5</sup>, Shaowei Li<sup>1</sup>, Tong Cheng<sup>1</sup>, Qinjian Zhao<sup>1</sup>, Yixin Chen<sup>1</sup>, Ting Wu<sup>1</sup>, Tianying Zhang<sup>1\*</sup>, Jun Zhang<sup>1\*</sup>, Hua Cao<sup>5\*</sup>, Huachen Zhu<sup>2,3,4\*</sup>, Quan Yuan<sup>1\*</sup>, Yi Guan<sup>2,3,4\*</sup>, Ningshao Xia<sup>1,6\*</sup>

## Affiliations:

<sup>1</sup>State Key Laboratory of Molecular Vaccinology and Molecular Diagnostics, National Institute of Diagnostics and Vaccine Development in Infectious Diseases, School of Public Health & School of Life Sciences, Xiamen University, Xiamen 361102, P. R. China.

<sup>2</sup>State Key Laboratory of Emerging Infectious Diseases, School of Public Health, Li Ka Shing Faculty of Medicine, The University of Hong Kong, Hong Kong SAR, P. R. China.

<sup>3</sup>Guangdong-Hong Kong Joint Laboratory of Emerging Infectious Diseases/Joint Laboratory for International Collaboration in Virology and Emerging Infectious Diseases, Joint Institute of Virology (STU/HKU), Shantou University, Shantou, Guangdong, 515063, P. R. China.

<sup>4</sup>EKIH Pathogen Research Institute, Futian District, Shenzhen, Guangdong, 518045, P. R. China.

<sup>5</sup>Key Laboratory of Technical Evaluation of Fertility Regulation for Non-human Primate, National Health Commission, Fujian Maternity and Child Health Hospital, Affiliated Hospital of Fujian Medical University, Fuzhou 350013, Fujian, P. R. China.

<sup>6</sup>Research Unit of Frontier Technology of Structural Vaccinology, Chinese Academy of Medical Sciences, Xiamen 361102, Fujian, P. R. China.

†These authors contributed equally to this work.

\*Corresponding author. Email: zhangtianying@xmu.edu.cn (T. Z.), zhangj@xmu.edu.cn (J. Z.), zhuhch@hku.hk (H. Z.), caohua69@fjmu.edu.cn (H. C.), yuanquan@xmu.edu.cn (Q. Y.), yguan@hku.hk (Y. G.), nsxia@xmu.edu.cn (N. X.)

## Abstract

The widespread SARS-CoV-2 in humans results in the continuous emergence of new variants. Recently emerged Omicron variant with multiple spike mutations sharply increases the risk of breakthrough infection or reinfection, highlighting the urgent need for new vaccines with broad-spectrum antigenic coverage. Using inter-lineage chimera and mutation patch strategies, we engineered a recombinant monomeric spike variant (STFK1628x), which showed high immunogenicity and mutually complementary antigenicity to its prototypic form (STFK). In hamsters, a bivalent vaccine comprised of STFK and STFK1628x elicited high titers of broad-spectrum antibodies to neutralize all 14 circulating SARS-CoV-2 variants, including Omicron; and fully protected vaccinees from intranasal SARS-CoV-2 challenges of either the ancestral strain or immune-evasive Beta variant. Strikingly, the vaccination of hamsters with the bivalent vaccine completely blocked the within-cage virus transmission to unvaccinated sentinels, for either the ancestral SARS-CoV-2 or Beta variant. Thus, our study provides new insights and antigen candidates for developing next-generation COVID-19 vaccines.

## Introduction

The ongoing coronavirus disease 2019 (COVID-19) pandemic caused by the severe acute respiratory syndrome coronavirus 2 (SARS-CoV-2) poses an unbearable public health burden. The SARS-CoV-2 spike mainly contains three immunogenic domains as targets of neutralizing antibody (nAb), the N-terminal domain (NTD), the receptor-binding domain (RBD), and the subunit 2 (S2), thereby serving as the essential antigen of COVID-19 vaccines. Though several COVID-19 vaccines are available, the constant emergence of SARS-CoV-2 variants is challenging against the protective efficacy of vaccination. Viral genome mutations may alter the biological phenotypes of SARS-CoV-2 in many aspects, such as viral infectivity, pathogenicity, and antigenicity. Critically, the

1 amino-acid substitutions in the antigenic sites of the spike protein may enable  
2 viruses to escape from naturally acquired and vaccine-induced immunity (1).  
3 Among the variants currently identified as variants of concern (VOCs) or  
4 variants of interest (VOIs), many were able to cause immune escape. The Beta  
5 (B.1.351) variant, first identified in South Africa, was found to cause a 6.5-8.6-  
6 fold decrease in nAb titers raised by existing mRNA vaccines (2). Besides, the  
7 Gamma (P.1), Delta (B.1.617.2), and Mu (B.1.621) variants also caused a 3.8-  
8 4.8-, 2.9- and 9.1-fold nAb decrease, respectively, according to previous reports  
9 (3, 4). The recently emerged Omicron (B.1.1.529) variant, being firstly identified  
10 in November 2021 and rapidly designated as a new VOC, has shown elevated  
11 risks in causing risk of breakthrough infection or reinfection due to its multiple  
12 spike mutations altering viral antigenicity (5-9).

13 Most of the currently licensed COVID-19 vaccines were designed based on the  
14 SARS-CoV-2 prototype spike; their vaccine effectiveness (VE) appeared to be  
15 compromised in countering variants with immune evasion. The phase 3 clinical  
16 trial of AZD1222 indicated that this vaccine was ineffective against mild-to-  
17 moderate COVID-19 disease due to the Beta variant (10). For Omicron, a  
18 recent study showed that the efficacy of two doses of BNT162b2 against  
19 symptomatic illnesses caused by this variant was only about 30%, whereas  
20 AZD1222 did not show a significant protective effect (11). Several vaccine  
21 manufacturers have announced their plans of antigen updates in developing  
22 vaccines with broad-spectrum protection (12, 13). An ideal goal is to develop a  
23 new antigen providing a broad-spectrum coverage for all SARS-CoV-2 variants  
24 that resist nAbs raised by the prototypic spike. However, it remains hugely  
25 challenging to achieve this goal.

26 In this study, using inter-lineage chimera and mutation patch strategies, we  
27 generated a serial of monomeric spike ectodomain proteins harboring multi-site  
28 mutations from different VOC/VOI variants. Our evaluations demonstrated a  
29 chimeric spike protein of STFK1628x, containing NTD from B.1.620 lineage,

1 RBD-S2 from the Gamma variant, and additional RBD mutation patches from  
2 the Delta variant, showed mutually complementary antigenicity to the ancestral  
3 spike-derived STFK protein. The bivalent vaccine of STFK plus STFK1628x  
4 exhibited high immunogenicity to elicit high titers of broad-spectrum neutralizing  
5 antibodies to protect against *in vivo* challenges with the ancestral SARS-CoV-  
6 2 and Beta variant in hamsters. More importantly, we further evidenced the new  
7 bivalent vaccine could block the within-cage virus transmission from vaccinated  
8 hamsters to unvaccinated sentinels. Overall, our findings shed light on the  
9 understandings of antigenic and immunogenic characteristics of SARS-CoV-2  
10 spike variants, also providing antigen candidates for developing next-  
11 generation COVID-19 vaccines.

## 12 **Results**

### 13 **Monomeric spike ectodomain STFK protein is highly immunogenic in** 14 **rodents and nonhuman primates**

15 Several studies had demonstrated the immunogenicity of recombinant SARS-  
16 CoV-2 spike ectodomain protein in trimeric forms (14-17). However, introducing  
17 the exogenous trimerization domain may elicit an unexpected immune  
18 response(14). Moreover, the recombinant trimer protein may dissociate during  
19 the cell cultures and downstream purification process, which decreases the  
20 yield of homogeneous trimeric proteins for vaccine production. Therefore, we  
21 tried to design and produce monomeric spike proteins for the COVID-19  
22 vaccine to address these issues. Although numerous high-resolution structures  
23 of SARS-CoV-2 spike trimers were reported, the detailed structure of the S2 C-  
24 terminus, particularly for those after amino acid (aa) 1146, was not resolved.  
25 We tested eight constructs of furin site mutated spike ectodomain with  
26 progressively truncated C-terminus in Chinese hamster ovary (CHO) cells.  
27 Interestingly, the C-terminal truncation to various positions between aa1152 and  
28 aa1192 resulted in higher expression levels and purification yields than the  
29 construct encompassing the entire ectodomain (S1208) (**Fig. 1A**). In addition,

1 the C-terminal truncated spike proteins presented comparable, even better  
2 ACE2 binding activity to the trimeric StriFK protein (17) (**fig. S1A**). To minimize  
3 the potential epitope loss associated with C-terminal truncation, we finally  
4 chose the construct of S1192 encompassing aa 1-1192 (hereafter designated  
5 STFK) as an immunogen candidate for further study. As expected, the STFK  
6 was presented in monomeric form, as evidenced by the SEC-HPLC and native-  
7 PAGE analyses (**Fig. 1B**). In contrast to the trimeric StriFK, the STFK elicited  
8 significantly higher nAb titers against the pseudotyped virus (PsV) in mice at  
9 weeks 1 ( $P = 0.002$ ) and 2 ( $P = 0.028$ ) after the 1<sup>st</sup> prime vaccine dose,  
10 suggesting the advantage of the STFK for induction of rapid humoral response.  
11 After the 2<sup>nd</sup> dose immunization, both STFK and StriFK-based vaccines  
12 generated comparable nAb titers (**Fig. 1C**).

13 To determine the structural basis for the excellent immunogenicity of the STFK,  
14 we resolved the cryo-electron microscopy (cryo-EM) structure of the STFK in  
15 complex with three previously reported nAbs 36H6, 83H7, and 85F7 (18, 19).  
16 Following the previous classifications of the nAbs targeting epitopes (Class I-V)  
17 (20, 21), the 36H6, 83H7, and 85F7 were categorized into Class II, V, and III,  
18 according to their binding modes, respectively (**fig. S2** and **S3**). The 3.81Å  
19 resolution structure of the immune-complex confirmed the monomeric form of  
20 the STFK, which could interact with three antigen-binding fragments (Fabs) of  
21 nAbs simultaneously (**Fig. 1D**, **fig. S2A**, and **Table S1**). The STFK is  
22 structurally similar to the monomeric form dissociated from a spike trimer (22).  
23 Due to the conformational flexibility in the monomeric form, the S2 subunit was  
24 not visualized in the reconstruction. However, in contrast to the trimeric spike,  
25 the STFK presents a more exposed RBD and NTD, thereby making the nAb  
26 epitopes more accessible and may contribute to its advantage for eliciting rapid  
27 nAb response.

28 Next, we evaluated the dose-dependent immunogenicity of the STFK-based  
29 vaccine with the FH002C adjuvant in the BALB/c mice, rhesus monkeys, and

1 golden hamsters. In our previous study, the FH002C, a risedronate-modified  
2 new adjuvant, showed potent immunostimulatory effects for hormonal and  
3 cellular immune responses (17). In BALB/c mice, STFK vaccinations generated  
4 a dose-dependent response for the anti-spike IgG, anti-RBD IgG (**fig. S1B**),  
5 and neutralizing antibodies at 0.01 to 10 µg dose levels (**Fig. 1E**). Two injections  
6 of STFK at a dose level as low as 0.1 µg induced a potent nAb response  
7 showing geometric mean titers (GMT) of 3.9 log<sub>10</sub> against the PsV and 362  
8 against the authentic virus (200 TCID<sub>50</sub>) that were 3.5- and 2.3-fold higher than  
9 that of the NIBSC 20/136 anti-SARS-CoV-2 standard (1,000 IU/mL) in the  
10 corresponding assays (**Fig. 1E**). In rhesus monkeys, STFK vaccinations at 1 or  
11 15 µg dose levels also elicited strong humoral immune responses (**Fig. 1F** and  
12 **fig. S1C**), as shown that immunized animals presented high nAb titers against  
13 either PsV (GMT=4.1 and 4.5 log<sub>10</sub> for 1 and 15 µg groups, respectively) or  
14 authentic virus (GMT=588 and 1,351 for 1 and 15 µg groups, respectively). In  
15 addition, hamsters that received STFK vaccines of 0.1-10 µg per dose showed  
16 comparable and >4.0 log<sub>10</sub> of nAb titers at week-2 after the boost dose (**Fig. 1G**  
17 and **fig. S1D**). Overall, the nAb titers (referred to as PsV nAb GMTs) elicited by  
18 1 µg of FH002C-adjuvanted STFK vaccine were about 4.2 to 9.3-fold higher  
19 than that of the NIBSC 20/136 standard in mice, monkeys, and hamsters. Apart  
20 from humoral immunity, vaccinated mice also presented potent spike-specific T  
21 cell responses ( $P < 0.001$ ) (**fig. S1E**). These data demonstrated the promising  
22 immunogenicity of the monomeric STFK recombinant protein in rodents and  
23 nonhuman primates.

#### 24 **Engineered STFK variant protein provides broad antigenic coverage** 25 **which compensates with prototypic spike**

26 We investigated the impacts of 14 VOC/VOI variants on nAbs raised by the  
27 prototypic STFK in animals. Notably, all sera from ten monkeys and eight  
28 hamsters at week-2 after 2-dose vaccinations showed detectable nAbs against  
29 all PsVs bearing VOC/VOI spike variants, including the newly emerged

1 Omicron (**Fig. 1H**). However, by contrast to that against D614G lineage, STFK-  
2 elicited nAb titers in monkeys were markedly decreased (>5-fold) for Beta  
3 (6.5×), Mu (B.1.621) (14×), B.1.620 (17×), Omicron (34×); were mild to  
4 moderately reduced (2- to 5-fold) for A.VOI.V2 (4.4×), Gamma (2.9×), Eta  
5 (B.1.525) (3.2×), Iota\_484K (B.1.526) (2.8×), Iota\_477N (B.1.526) (2.4×), and  
6 Kappa (B.1.617.1) (2.0×) (**Fig. 1H and 1I**). For Alpha, Delta, Epsilon (B.1.429),  
7 and Lambda (C.37) variants, the nAb titers only slightly changed a (<2-fold).  
8 Moreover, sera from immunized hamsters presented highly similar ( $R^2=0.889$ ,  
9  $P < 0.001$ ) cross-neutralizing profiles to that of monkeys (**Fig. 1I**). These results  
10 are consistent with findings in humans that the E484K-harboring variants and  
11 the Omicron may markedly evade nAbs raised by the prototypic spike.

12 Following the approach as graphically depicted in **Fig. 2A**, we aimed to develop  
13 a new STFK antigen providing complementary antigenic coverage to the  
14 prototypic protein to address the concerns for the evasive variants (**Fig. 2A**).  
15 As the Mu and Omicron variants had not emerged when our experiment started,  
16 we firstly tested mutated STFK antigens based on the spikes of Beta  
17 (STFK1351), Gamma (STFK1128), and B.1.620 (STFK1620) variants (**fig. S4**).  
18 Compared to those immunized with STFK, hamsters vaccinated with  
19 STFK1351, STFK1128, and STFK1620 showed 1.0-3.0×, 1.3-6.2×, and 1.7-  
20 5.5× increased nAb titers (GMTs) in neutralizing four immune-escape variants  
21 (Gamma, A.VOI.V2, Beta, and B.1.620) (**fig. S5**). The STFK1128 exhibited  
22 better immunogenicity than the other two, as it raised ~4.0 log<sub>10</sub> of nAb GMT in  
23 neutralizing its parental virus (Gamma) (**fig. S5**). In contrast, Beta variant-  
24 derived STFK1351 was poorly immunogenic.

25 We then introduced circulating RBD mutations absent in the Gamma variant  
26 but present in other VOC/VOI viruses into the STFK1128 backbone for the  
27 following engineering. We used the mutations of L452R (noted in Delta, Kappa,  
28 Epsilon), S477N (presented in Iota\_477N and B.1.620), T478K (Delta-derived),  
29 and E484Q (Kappa-derived, to replace the E484K in STFK1128) to generate



1 six new antigens (**fig. S6**). Hamster immunization tests revealed that the  
2 STFK1128e (L452R/S477N/E484Q), STFK1128f (L452R/T478K/E484K), and  
3 STFK1128g (L452R/T478K/E484Q) displayed improvements on the cross-  
4 neutralization spectrum in comparison to the STFK1128 (**fig. S6C**). As the Delta  
5 became the dominant variant worldwide since June 2021, we selected the  
6 STFK1128f exhibiting higher titers of nAbs to neutralize both Beta and Delta  
7 viruses as a candidate for further optimization.

8 Besides RBD mutations, NTD deletions presented in several VOC/VOI variants  
9 may also contribute to their immune-escape potentials. To cover the mutated  
10 NTD epitopes, we designed two inter-lineage chimeric constructs of  
11 STFK1328x and STFK1628x; the former included the NTD of STFK1351 (Beta),  
12 and the latter had the NTD of STFK1620 (B.1.620). Both constructs shared the  
13 RBD-S2 domain of STFK1128f, except a K417N in STFK1328x. Remarkably,  
14 the STFK1628x could elicit a broad and potent neutralizing antibody response  
15 in hamsters (**fig. S7A**), which showed 4.1-12.8× increased nAb titers (GMT)  
16 than prototypic STFK in neutralizing the A.VOI.V2 (4.1×), Gamma (7.6×), Beta  
17 (12.8×) and B.1.620 (8.5×). In contrast to its parental STFK1128f, the  
18 STFK1628x also exhibited higher nAb titers against most VOC/VOI variants  
19 (**Fig. 2B** and **fig. S7B**). These data supported the STFK1628x as a promising  
20 antigen candidate for the updated COVID-19 vaccine. As our previous study  
21 suggested that the aa 439-448 was another hot-spot region in addition to aa484  
22 (19), we further made two modified STFK1628x versions, designated  
23 STFK1628y and STFK1628z, that included N440K and G446V, respectively  
24 (**Fig. 2B** and **fig. S7B**). The STFK1628y and STFK1628z displayed distinct  
25 antigenic profiles in hamsters (**fig. S7**). Notably, in contrast to the prototypic  
26 antigen, the STFK1628x and STFK1628y elicited significantly increased nAb in  
27 neutralizing two newly emerged variants, Mu (5.5×,  $P = 0.002$  for STFK1628x;  
28 4.0×,  $P = 0.010$  for STFK1628y) and Omicron (7.4×,  $P = 0.002$  for STFK1628x;  
29 30.7×,  $P = 0.010$  for STFK1628y) (**fig. S7C**). Following these data, we



1 formulated a bivalent vaccine using the STFK1628x and the prototypic STFK  
2 at a mass ratio of 1:1. To most of the VOC/VOI variants, hamsters immunized  
3 with the bivalent vaccine showed significantly ( $P < 0.05$ ) increased nAb levels  
4 to that elicited by the prototypic antigen in neutralizing the D614G virus ( $\sim 4.0$   
5  $\log_{10}$ ) (**Fig. 2B** and **2C**). Strikingly, the bivalent vaccine yielded a nAb GMT of  
6 2,130 ( $ID_{50}$  range: 9,61 to 4,763) to the highly immune-evasive Omicron, which  
7 was about 36-fold higher than the NIBSC 20/136 immunoglobulin standard  
8 ( $ID_{50}=60$  to Omicron). Taken together, STFK plus STFK1628x provided a full-  
9 spectrum neutralization coverage to all VOC/VOI variants.

10 We also obtained a 3.88 Å cryo-EM structure of the STFK1628x in complexed  
11 with three nAbs 83H7, 85F7, and 2B4 (**Fig. 2D**, **fig. S2B**, and **Table S1**). As the  
12 T478K abolishes the activity of 36H6 nAb, we replaced the 36H6 with a class  
13 IV mAb of 2B4 with cross-SARS-CoV-1/2 neutralization potency (**fig. S3D**) (18).  
14 As expected, the STKF1628x presented a similar structure to STFK but showed  
15 distinguished densities on the mutation sites, such as 417, 452, 478, 484, and  
16 501, corresponding to its alternative antigenic profile (**Fig. 2E**).

## 17 **The bivalent vaccine protects hamsters against intranasal SARS-CoV-2** 18 **challenges**

19 To assess the ability of the STFK-based vaccine to mediate protection against  
20 SARS-CoV-2, we intranasally challenged hamsters that received STFK,  
21 STFK1628x, or bivalent vaccines (**Fig. 3A**). For either challenge with the  
22 ancestral strain or Beta variant, vaccinated hamsters showed an average of  
23 2.2-4.6% weight increase to their baseline levels by the end of a 7-day follow-  
24 up (**Fig. 3B** and **3C**). By contrast, unvaccinated animals showed a maximum  
25 weight loss of 14.8% and 13.8% by 7 days post-infection (dpi) in the ancestral  
26 strain and Beta variant challenges, respectively. Moreover, 1 of 8 and 5 of 8  
27 animals died from ancestral SARS-CoV-2 and beta variant infections,  
28 respectively, but none in the vaccinated groups (**Fig. 3D** and **3E**).

29 At 7 dpi, the median viral RNA levels of control hamsters challenged by the

1    prototypic virus were 7.26 (range 5.24-7.78) log<sub>10</sub> in the lung, 6.88 (range 6.12-  
2    7.32) log<sub>10</sub> in the nasal turbinate, and 6.29 (range 5.04-6.67) log<sub>10</sub> copies/mL in  
3    the trachea (**Fig. 3F** and **fig. S8A**). By contrast, hamsters that received  
4    vaccinations of either STFK, STFK1628x, or the bivalent version showed  
5    significant ( $P < 0.01$  for each comparison) viral RNA reductions by >5.0 log<sub>10</sub>,  
6    2.0-3.0 log<sub>10</sub>, 3.0-4.0 log<sub>10</sub> copies/mL in tissues of the lung, nasal turbinate, and  
7    trachea, respectively (**Fig. 3F** and **fig. S8A**). To protect the prototypic virus  
8    challenge, the three vaccine candidates appeared with comparable efficacy ( $P >$   
9    0.05) in decreasing viral loads of the respiratory tract tissues (**Fig. 3F** and **fig.**  
10    **S6A**). In the Beta variant challenges, control hamsters also showed high levels  
11    of viral RNA similar to that infected with the prototypic virus in their respiratory  
12    tract tissues. For vaccinated animals, the medians of pulmonary viral loads  
13    were 1.05, 0.35, and 3.36 log<sub>10</sub> copies/mL in the STFK1628x, bivalent and  
14    STFK groups, corresponding to reductions of 6.27 ( $P < 0.0001$ ), 6.96 ( $P <$   
15    0.0001), and 3.96 ( $P = 0.01$ ) log<sub>10</sub> to controls, respectively (**Fig. 3G**). In tissues  
16    of nasal turbinate and trachea, no statistically significant difference in viral RNA  
17    suppression was observed among the 3 vaccination groups (**fig. S8B**), but  
18    hamsters immunized with the bivalent vaccine presented relatively lower viral  
19    loads than the others.

20    In addition to mediating virological suppressions, the three vaccines also  
21    protected hamsters from lung disease caused by SARS-CoV-2 infections.  
22    Pathological examinations revealed most unvaccinated hamsters presented  
23    severe pulmonary diseases at 7 dpi regardless of the challenged virus type (**Fig.**  
24    **3H** and **3I**, **fig. S8C** and **S8D**). In contrast, gross lung observations and  
25    pulmonary pathology scorings demonstrated all vaccinated animals were free  
26    from moderate-to-severe pneumonia, with the only exception noted in one from  
27    the STFK group challenged with Beta variant (**Fig. 3I**). These data indicated  
28    that the STFK, STFK1628x, and the bivalent vaccines effectively protected  
29    hamsters against the SARS-CoV-2 challenge. Moreover, the STFK1628x and

1 the bivalent vaccine showed better protective efficacy against the Beta variant  
2 challenge in hamsters.

### 3 **The bivalent vaccine blocks SARS-CoV-2 transmissions in hamsters**

4 In addition to protecting vaccine users from SARS-CoV-2 infection and  
5 pathology, an ideal COVID-19 vaccine should also reduce viral shedding and  
6 transmission by vaccinated individuals exposed to the virus. For assessments,  
7 index hamsters were immunized with either STFK1628x or the bivalent vaccine  
8 and were challenged intranasally with ancestral SARS-CoV-2 or Beta variant.  
9 One day later, naïve hamsters as sentinels were cohoused with index animals  
10 for 24 hours (**Fig. 4A**). After a subsequent 7-day follow-up, sentinels of the  
11 unvaccinated index hamsters showed an average weight loss of 4.0% and 1.7%  
12 in the ancestral virus and beta variant challenges, respectively. In contrast,  
13 sentinels of vaccinated indexes receiving either the STFK1628x or the bivalent  
14 version exhibited gradually increased weights (**Fig. 4B and 4C**). By the end of  
15 the experiment, all sentinels of the unvaccinated indexes had detectable viral  
16 RNA with approximate levels of 6.0-7.0 log<sub>10</sub> copies/mL in the respiratory tract  
17 tissues (**Fig. 4D and 4E**). By contrast, 4 (50%) and 1 (12.5%) sentinels  
18 cohoused with STFK1628-vaccinated hamsters, when challenged with the Beta  
19 variant and the ancestral SARS-CoV-2 respectively, showed detectable viral  
20 RNA in either tissue from the lung, nasal turbinate, or trachea. Remarkably, for  
21 either challenge of the two viruses, no sentinel hamster of the indexes  
22 immunized with the bivalent vaccine showed detectable viral RNA in any tissues  
23 from the lung, nasal turbinate, and trachea (**Fig. 4D and 4E**). These data  
24 supported complete protection from SARS-CoV-2 transmission conferred by  
25 the bivalent vaccine in hamsters.

26

### 27 **Discussion**

28 With the widespread SARS-CoV-2 infections in large populations of humans  
29 and other susceptible animals, the emergence of antigenic drift variants seems

1 inevitable. The newly identified Omicron variant with >30 spike mutations  
2 brought great challenges to established immunity by vaccination or resolved  
3 infections. Recent studies revealed that the Omicron had led to widespread  
4 escape from nAbs acquired from infections by the ancestral SARS-CoV-2 or  
5 other VOC variants, including Alpha, Beta, Gamma, and Delta (23, 24),  
6 exhibiting a distinctly altered antigenicity. This variant is also highly resistant  
7 against nAbs elicited by double immunizations of the authorized COVID-19  
8 vaccine (25). Though some studies have found the 3<sup>rd</sup> dose of vaccination may  
9 increase the nAb titer against Omicron, it was still lower than that against other  
10 variants (e.g., Delta) by several folds (26, 27). Next-generation COVID-19  
11 vaccines with pan-variants protection are urgently required to deal with the  
12 growing threat of Omicron-like immune-escape variants.

13 Adding another spike antigen of an immune-escape variant is the most common  
14 approach for developing an updated COVID-19 vaccine. Before Omicron  
15 emergence, the Beta and Gamma were two noticeable VOCs with increased  
16 immune evasion concerns; therefore, most previous studies used spikes from  
17 one of the two variants as the added antigen. The mRNA-1273.351, a Beta  
18 variant-based mRNA vaccine developed by Moderna, could elicit a potent nAb  
19 response against the Beta variant in mice but was inferior to that derived from  
20 the prototype-based mRNA-1273 in neutralizing the Gamma and Epsilon  
21 variants (27). Neutralizing antibodies elicited by vaccines formulated with either  
22 Beta or Gamma-derived spikes in animals appeared to be less effective against  
23 the Delta variant (28, 29). Consistent findings were also noted in the presented  
24 study (fig. S5). Moreover, in our data, neither spike antigens from variants of  
25 Beta (STFK1351), Gamma (STFK1128), nor B.1.620 (STFK1620) induced  
26 markedly improved nAb against Omicron in hamsters (fig. S7). Therefore, it is  
27 unlikely to generate broad-spectrum antigenic coverage by using a pre-existing  
28 naturally occurring variant.

29 Here, we provided a progressive approach to enlarge the cross-variants

1 antigenic covering of a recombinant spike protein. This approach followed inter-  
2 lineage chimera and mutation patch strategies. As the NTD, RBD, and S2  
3 contain neutralizing antibody-targeting epitopes, inter-lineage chimeric spike  
4 antigens might confer cross-variants antibody response (30). The engineered  
5 STFK1628x, providing mutually-complementary antigenic coverage to the  
6 prototypic spike, was a chimeric construct of the B.1.620-derived NTD and the  
7 Gamma variant derived RBD-S2. The B.1.620 NTD harbored amino-acid  
8 deletions of  $\Delta 69-70$ ,  $\Delta 145$ , and  $\Delta 242-244$ , correspond to changed epitopes on  
9 the N2, N3, and N5 loops (31). Notably, Alpha, Eta, and Omicron variants  
10 shared the  $\Delta 69-70$  and  $\Delta 145$ , whereas the Beta variant contained  $\Delta 242-244$ .  
11 The RBD-S2 of the two engineered antigens were derivatives of the Gamma  
12 spike with additional antigenic mutation patches of L452R and T478K. Our and  
13 others' studies both suggested the Gamma-derived spike was highly  
14 immunogenic to elicit potent nAb response against E484K-harboring variants,  
15 such as Beta and Gamma (32). As two Delta-derived characteristic mutations,  
16 the L452R and T478K introduction showed added value to improve the  
17 neutralization response against the Delta variant (fig. S6). In contrast to STFK,  
18 the monovalent STFK1628x and the STFK/STFK1628x-combined bivalent  
19 vaccines conferred improved protection against viral infection and transmission  
20 of SARS-CoV-2 Beta variant in hamsters (Fig. 3 and 4). Given the potent cross-  
21 variants neutralization response elicited by the STFK/STFK1628x-combined  
22 bivalent vaccine in hamsters, we can expect the broad-spectrum protection of  
23 the new vaccine.

24 Remarkably, the STFK1628x and its STFK1628y derivative elicited significantly  
25 higher nAb titers against the Omicron variant than the prototypic STFK (fig.  
26 S7D), possibly attributed to the shared mutations of  $\Delta 69-70$ , K417N/T, T478K,  
27 E484K/A, and N501Y. In comparison to STFK1628x, the STFK1628y has an  
28 additional N440K mutation but presented a 4-fold higher nAb titer to neutralize  
29 Omicron (fig. S7D), suggesting the N440K plays an essential role in changing

1 the antigenicity of this variant. Notably, as both antigens were generated before  
2 Omicron emergence, these results were encouraging and suggested the  
3 possibilities of prospective antigen design and vaccine preparations against an  
4 unknown future variant. Timely and comprehensive assessments for the  
5 antigenic influence of newly emerged spike mutations are essential for guiding  
6 vaccine antigen design.

7 Although trimerized spike antigens were commonly used in current COVID-19  
8 vaccines, our study found that the monomeric spike protein is also highly  
9 immunogenic in rodents and nonhuman primates. The CHO-derived C-terminal  
10 truncated STFK proteins maintained comparable ACE2 binding activity as the  
11 trimeric StriFK, conferred potent immune responses, and complete protection  
12 against SARS-CoV-2 in hamsters. The monomeric form with more exposed  
13 protein surfaces may enable more accessibilities of cryptic epitopes and  
14 thereby facilitating the rapid and diverse antibody response. Removing the  
15 additional motif required for protein trimerization eliminates unexpected  
16 immune responses targeting the trimeric domain. In addition, the high yield of  
17 STFK in the CHO-cell expression system (800-1,000 mg/L from stable cell lines)  
18 is beneficial to reduce manufacturing costs and deal with the global shortage of  
19 COVID-19 vaccines.

20 In summary, our study provides a new way to design new antigens for next-  
21 generation COVID-19 vaccines aiming to confer broad-spectrum protection.

# 1 **Materials and Methods**

## 2 **Constructs, protein expressions, and purifications**

3 Trimeric S-ectodomain proteins of SARS-CoV-2 (StriFK) were expressed and  
 4 purified as previously described (17). Expression cassettes encoding  
 5 monomeric S-ectodomain proteins (containing mutated furin-site, RRAR to  
 6 GSAS) involved in the study were generated by site-directed mutagenesis via  
 7 PCR cloning based on the parental codon-optimized StriFK (17). The  
 8 expression cassettes of S1152 to S1208 with C-terminal 8×His-tag were cloned  
 9 into the EIRBsMie vector (19). The tag-free STFK and STFK variants were  
 10 constructed into a pGS01b vector, modified from the pCGS3 vector containing  
 11 glutamine synthetase (GS) selection marker (Sigma Aldrich). All STFK  
 12 constructs had an N1192M modification to reduce potential protein aggregation,  
 13 possibly attributed the K933-N1192 interaction (33). As previously described,  
 14 transient protein expressions were performed using the ExpiCHO expression  
 15 system (Thermo Fisher Scientific). Stable cell lines expressing the STFK,  
 16 STFK1628x, and STKF1628y were generated via transfections of the PGS01b-  
 17 vectored constructs into CHOZN GS<sup>-/-</sup> cells (Sigma Aldrich) following GS  
 18 selections and single-cell clonings. Polyhistidine-tagged proteins (S1152 to  
 19 S1208) purified from culture supernatants were collected on day 7 after  
 20 transfection using Ni Sepharose 6FF (Cytiva). The tag-free STFK proteins were  
 21 purified by using Q-FF Sepharose ion-exchange chromatography (Cytiva).  
 22 Recombinant human ACE2 (human Fc tag, rACE2) protein also was produced  
 23 in ExpiCHO-S cells and purified by protein-A affinity chromatography column  
 24 (Cytiva) as previously described (17).

25

## 26 **SDS-polyacrylamide gel electrophoresis (SDS-PAGE) and Native-PAGE**

27 SDS-PAGE analyses were performed using 4-12% SurePAGE (Genscript), the  
 28 precast mini polyacrylamide gels. For native-PAGE, the protein samples were  
 29 mixed with the Native Sample Buffer (BIO-RAD) in equal volume and then



subjected to electrophoresis using the 7.5% Mini-Protein TGX Precast Protein Gels (Bio-RAD) in a non-denaturing buffer. Gel images were captured using FUSION FX7 Spectra multispectral imaging system (Vilber).

### **Size exclusion chromatography (SEC-HPLC)**

The SEC-HPLC analysis shown in Fig. 1B was performed using a TSK-GEL G3000PWXL column on an HPLC system (Waters Alliance) and conducted as described previously(17).

### **ACE2 binding assays**

A capture antibody 45C3 (developed in our laboratory) recognizes spike S2 domain was coated in 96-well microplates at 200ng per well. Plates were incubated overnight at 4 °C and then blocked with ELISA-blocking buffer (Wantai BioPharm). The STFK proteins were twofold serially diluted from 10 µg mL<sup>-1</sup> to 9.8 ng mL<sup>-1</sup> in duplicate and then added to wells (100 µL). After incubation for 1 hour at 25°C followed by washing with PBST buffer, rACE2 protein solution (100 µL per well, 1 µg mL<sup>-1</sup>) was added to the wells. Subsequently, the microplates were incubated for 1 hour at 25°C. After washing five times, HRP-conjugated anti-human IgG (Thermo Fisher Scientific) solutions were added and incubated for 1 hour at 25°C. Following washing five times, tetramethylbenzidine chromogen (TMB) solution (Wantai BioPharm) was added into microplates 100 µL per well. After a further 10 minutes of incubation at 25°C, 2 M H<sub>2</sub>SO<sub>4</sub> was added to stop the chromogen reaction, and the optical density (OD<sub>450-630</sub>) value was measured. The half-maximal effective concentration (EC<sub>50</sub>) was calculated by the 4-parameter logistic (4PL) regression using GraphPad Prism 8 software.

### **Vaccine preparations**

Recombinant spike protein subunit vaccines used in this study were composed

1 of spike proteins and a nitrogen bisphosphonate-modified zinc-aluminum hybrid  
2 adjuvant (FH002C), which was described detailly in our previous study(17).  
3 Briefly, the proteins were mixed with an equal volume of 2× concentration  
4 FH002C adjuvant to achieve the final desired concentration of antigen in the  
5 final formulation. All vaccine formulations were mixed well and stored at 2-8 °C  
6 until use.

7

## 8 **Experimental animals**

9 BALB/c and C57BL/6 mice were purchased from Shanghai SLAC Laboratory  
10 Animal Co., Ltd. Lakeview Golden (LVG) Syrian hamsters were purchased from  
11 Charles River Laboratories (Beijing). The animals were fed in Specific-  
12 pathogen-free circumstances. The mouse and hamster studies were carried out  
13 in strict accordance with the recommendations of the Guide for the Care and  
14 Use of Laboratory Animals under the approval of the Institutional Animal Care  
15 and Use Committee of Xiamen University. The rhesus monkey experiment was  
16 conducted at the Key Laboratory of Technical Evaluation of Fertility Regulation  
17 for Nonhuman Primate Inc in Fujian province.

18

## 19 **Mouse immunizations**

20 Six to eight-week-old BALB/c mice (n=6 per group) were immunized with STFK  
21 vaccines at 0.01, 0.1, 1, or 10 µg per dose in 150 µL through intramuscular  
22 injection following a two-dose schedule at weeks 0 and 3. Sera were collected  
23 at week 4 via retro-orbital bleeding to measure antibody titers. For T cell  
24 response assessment, six to eight-week-old C57BL/6 mice were immunized  
25 with STFK vaccine at 10 µg per dose in 150 µL through intramuscular injection.  
26 Immunized mice were sacrificed on day 7 after immunization to collect  
27 splenocytes for further assay.

28

## 29 **Rhesus monkey immunizations**

1 Ten rhesus monkeys were allocated randomly into two groups (three females  
2 and two males per group). Groups of monkeys were injected with 1 µg or 15 ug  
3 of STFK vaccine per dose (150 µL) via the intramuscular route for 2 doses. All  
4 monkeys were vaccinated at weeks 0 and 4. Two weeks after boosting, serum  
5 samples were collected for antibody analyses, including measurement of anti-  
6 spike IgG, anti-RBD IgG, pseudovirus neutralizing antibody, and authentic  
7 neutralizing antibody titers.

8

### 9 **Hamster immunizations**

10 Six to eight-week-old hamsters were used to evaluate the immunogenicity and  
11 protective effect of the vaccine candidates. Each group contained four males  
12 and four females. Groups of hamsters were immunized intramuscularly twice  
13 with the vaccine candidates at 10 µg per dose in 200 µl, three weeks apart. All  
14 serum samples were collected at week-2 after the 2<sup>nd</sup> dose via retro-orbital  
15 bleeding to measure the antibody titers.

16

### 17 **Pseudovirus (PsV) neutralization assays**

18 The nAb titers against the ancestral spike-pseudotyped virus presented in Fig.  
19 1C and 1E-1G were determined by using a vesicular stomatitis virus (VSV)  
20 system as previously described (34). The International Standard for anti-SARS-  
21 CoV-2 immunoglobulin (NIBSC code: 20/136) was obtained from National  
22 Institute for Biological Standards and Control, UK (35).

23 The lentiviral-based pseudovirus (LV) neutralization assay was used to  
24 determine vaccine-elicited nAbs against circulating SARS-CoV-2 variants (Fig.  
25 1H, 2, S5, S6, and S7). The lentiviral pseudoviruses bearing spikes from SARS-  
26 CoV-2 variants were generated as described previously (19, 36), including  
27 D614G (site-directed mutagenesis), Alpha (B.1.1.7, GISAID accession number:  
28 EPI\_ISL\_601443), Beta ( B.1.351, EPI\_ISL\_700428), Gamma (P.1,  
29 EPI\_ISL\_792680), Delta (B.1.617.2, EPI\_ISL\_1662451), Omicron (B.1.1.529,  
30 BA.1, EPI\_ISL\_6704867), Iota\_484K (B.1.526\_484K, EPI\_ISL\_1009654),

1 Iota\_477N (B.1.526\_477N, EPI\_ISL\_995145), Epsilon (B.1.429,  
2 EPI\_ISL\_873881), Eta (B.1.525, EPI\_ISL\_762449), Kappa (B.1.617.1,  
3 EPI\_ISL\_1595904), A.VOI.V2 (EPI\_ISL\_1347941), Lambda (C.37,  
4 EPI\_ISL\_2921532), Mu (B.1.621, EPI\_ISL\_3933281) and B.1.620  
5 (EPI\_ISL\_1620228). The PsV nAb measurements were performed as  
6 previously described using Opera Phenix or Operetta CLS High-Content  
7 Analysis System (PerkinElmer) (19).

8

### 9 **Authentic SARS-CoV-2 neutralization assay**

10 The nAb titers of sera from immunized animals against authentic SARS-CoV-2  
11 were detected using a cytopathic effect (CPE)-based microneutralization assay  
12 as previously described (37). The ancestral virus (BetaCoV/Jiangsu/JS02/2020,  
13 EPI\_ISL\_411952) was used. Briefly, serum samples were twofold serially  
14 diluted from 1:4 to 1:8192 in duplicate with DMEM medium. All prepared  
15 samples were mixed with the virus of 200 TCID<sub>50</sub> and incubated for 2 hours at  
16 37 °C. The mixtures (150 µL per well) were added to a monolayer of Vero cells  
17 in a 96-well plate and incubated at 37 °C supplying with 5% CO<sub>2</sub>. Three-day  
18 later, the cytopathic effect was assessed with microscopic examinations. The  
19 neutralizing titer of serum was expressed as the reciprocal of the maximal  
20 sample dilution that protects at least 50% of cells from CPE.

21

### 22 **Enzyme-linked immunospot (ELISpot) assay**

23 According to the manufacturer's instructions, the assays were performed with  
24 mouse IFN-γ ELISpot plates kits (Dakewe Biotech, 2210005). In brief, single-  
25 cell suspensions were obtained from mouse spleen (10<sup>6</sup> cells per well) through  
26 grinding in 70 µm cell strainers and were seeded in anti-mouse IFN-γ antibody  
27 precoated ELISpot plates. Then, cells were incubated with pooled peptides of  
28 SARS-CoV-2 spike (15-mer peptides with 11aa overlap covering the entire  
29 spike protein; GenScript) and cultured at 37°C with 5% CO<sub>2</sub> for 20 hours. Spots

were counted and analyzed by using CTL-ImmunoSpot S5 (Cellular Technology Limited). The numbers of IFN- $\gamma$ -secreting cells were calculated by subtracting phosphate-buffered saline (PBS)-stimulated wells from spike peptide pool-stimulated wells.

## **Anti-RBD, anti-spike IgG measurements**

Microplates pre-coated with recombinant antigens of RBD or spike ectodomain were provided by Beijing Wantai Biological Pharmacy. The measurements were performed following previously described procedures (17), with the only difference that the cutoff (CO) value was set as 0.1 (OD<sub>450-630</sub>). The IgG titer of each sample was determined as the cutoff index (OD<sub>450-630</sub>/CO) at the dilution limit multiplied by the maximum dilution folds. Representative data from technical replicates were performed at least twice for plotting.

## **Cryo-EM sample preparation and data collection**

Fabs of 36H6, 83H7, 2B4, and 85F7 were prepared by papain digestion of the mAbs and further purified with MabSelect SuRe (Cytiva). Aliquots (3  $\mu$ l) of 3.5 mg/mL mixtures of purified STFK or STFK1628x proteins in complex with excess Fab fragments of nAbs were incubated in 0.01% (v/v) Digitonin (Sigma) and then loaded onto glow-discharged (60 s at 20 mA) holey carbon Quantifoil grids (R1.2/1.3, 200 mesh, Quantifoil Micro Tools) using a Vitrobot Mark IV (ThermoFisher Scientific) at 100% humidity and 4°C. Data were acquired using the SerialEM software on an FEI Tecnai F30 transmission electron microscope (ThermoFisher Scientific) operated at 300 kV and equipped with a Gatan K3 direct detector. Images were recorded in the 36-frame movie mode at a nominal 39,000 $\times$  magnification at super-resolution mode with a pixel size of 0.339 Å. The total electron dose was set to 60 e<sup>-</sup> Å<sup>-2</sup>, and the exposure time was 4.5 s.

## **Image processing and 3D reconstruction**

1 Drift and beam-induced motion correction were performed with MotionCor2 (38)  
2 to produce a micrograph from each movie. Contrast transfer function (CTF)  
3 fitting and phase-shift estimation were conducted with Gctf (39). Micrographs  
4 with astigmatism, obvious drift, or contamination were discarded before  
5 reconstruction. The following reconstruction procedures were performed by  
6 using Cryosparc V3 (40). In brief, particles were automatically picked by using  
7 the "Blob picker" or "Template picker". Several rounds of reference-free 2D  
8 classifications were performed, and the selected good particles were then  
9 subjected to ab-initio reconstruction, heterogeneous refinement and final non-  
10 uniform refinement. The resolution of all density maps was determined by the  
11 gold-standard Fourier shell correlation curve, with a cutoff of 0.143. Local map  
12 resolution was estimated with ResMap (41).

13

#### 14 **Atomic model building, refinement, and 3D visualization**

15 The initial models of nAbs were generated from homology modeling by Accelrys  
16 Discovery Studio software (available from: <https://www.3dsbiovia.com>). The  
17 structure from the prototypic trimeric spike (PDB no. 6VSB) (42) was used as  
18 the initial modes of our proteins. We initially fitted the templates into the  
19 corresponding final cryo-EM maps using Chimera (43), and further corrected  
20 and adjusted them manually by real-space refinement in Coot (44). The  
21 resulting models were then refined with phenix.real\_space\_refine in PHENIX  
22 (45). These operations were executed iteratively until the problematic regions,  
23 Ramachandran outliers, and poor rotamers were either eliminated or moved to  
24 favored regions. The final atomic models were validated with Molprobit (46,  
25 47). All figures were generated with Chimera or ChimeraX (48).

26

#### 27 **SARS-CoV-2 virus challenges in hamster**

28 Two weeks after boosting, hamsters were challenged with the ancestral SARS-  
29 CoV-2 of hCoV-19/China/AP8/2020 (EPI\_ISL\_1655937) or Beta variant of

1 hCoV-19/China/AP100/2021 (EPI\_ISL\_2779639). For the intranasal challenge,  
2 hamsters were challenged with  $1 \times 10^4$  PFU of SARS-CoV-2 virus (diluted in 100  
3  $\mu$ L of PBS) through the intranasal route under anesthesia. For virus  
4 transmission-blocking study, vaccinated- or unvaccinated-hamsters were  
5 intranasally inoculated with  $1 \times 10^4$  PFU of ancestral SARS-CoV-2 or Beta  
6 variant as indexes. One day post-infection, index hamsters were cohoused with  
7 naïve sentinels for one day (Fig. 4A). The daily diet was limited to 7 g per 100  
8 g of body weight to prevent animals from overeating. All hamsters were  
9 monitored for body weight until being humanely euthanized on day 7 after  
10 challenge or exposure. The respiratory tissues of hamsters were collected for  
11 viral RNA quantification or histopathological assessments. All challenge  
12 experiments were conducted in the Animal Biosafety Level 3 (ABSL-3) facility.

13

#### 14 **SARS-CoV-2 RNA quantification**

15 Viral RNA levels in tissues from hamsters were determined by SARS-CoV-2  
16 RT-PCR Kit (Wantai BioPharm). For each animal, two pieces (separately) of  
17 lung tissue (0.1~0.2 g each), one piece of the trachea tissue (0.1~0.2 g), and a  
18 half of nasal turbinate (0.8~1.2 g) were respectively homogenized with  
19 TissueLyser II (Qiagen) in 1 ml PBS. Viral RNA in tissue lysates was extracted  
20 using the QIAamp Viral RNA Mini Kit (Qiagen) and subjected to qRT-PCR  
21 assays. Representative data from technical replicates were obtained from at  
22 least two independent experiments for plotting.

23

#### 24 **Histopathology**

25 The lung tissues from challenged hamsters were fixed with neutral buffered  
26 formalin for 48 hours and processed routinely into paraffin blocks. Then tissues  
27 were sectioned to 3  $\mu$ m by microtome (Leica). Next, the fixed lung sections  
28 were stained with hematoxylin and eosin (Maxim Biotechnology). Whole-slide  
29 images of the lung sections were captured with the EVOS M7000 Images



1 System (Thermo Fisher Scientific). Microscopic evaluation of pathological lung  
2 lesions was performed blindly by pathologists following a semiquantitative  
3 scoring system with the inclusion of three indicators (49): (i) alveolar septum  
4 thickening and consolidation; (ii) hemorrhage, exudation, pulmonary edema,  
5 and mucous; and (iii) recruitment and infiltration of inflammatory immune cells.  
6 For each hamster, three or four lobes of the lung were assessed independently,  
7 and the average score was calculated to indicate the overall pathological  
8 severity.

9

## 10 **Statistical analysis**

11 The Mann-Whitney *U* test was used for the comparison between two  
12 independent samples. The uncorrected Kruskal-Wallis test, Dunnett's Multiple  
13 Comparison test, or uncorrected Fisher's LSD test was applied to analyze  
14 differences among more than two groups. A two-sided log-rank test was applied  
15 to compare the difference in survival. Statistical differences were considered to  
16 be significant for two-tailed *P* values of  $< 0.05$ . All statistical analyses were  
17 conducted in GraphPad Prism 8 software.

18

## 19 **ACKNOWLEDGMENTS**

20 **Funding:** This study was supported by National Natural Science Foundation of  
21 China grants 81991491 (to N.S.X.), 81871316 (to Q.Y.), 31730029 (to N.S.X.),  
22 U1905205 (to Q.Y.), 81902057 (to Y.L.Z.), 32170943 (to T.Y.Z.); the Science  
23 and Technology Major Project of Xiamen (3502ZZ2021YJ013 to Y.L.Z.); funding  
24 for Guangdong-Hongkong-Macau Joint Laboratory grant 2019B121205009 (to  
25 Y.G.) and EKI Pathogen Research Institute grant HZQB-KCZY-2021014 (to  
26 Y.G.); Fujian Natural Science Foundation for Distinguished Young Scholars  
27 grant 2020J06007 (to T.Y.Z.). We thank Dr. Huirong Pan, Dr. Daning Wang from  
28 Xiamen Innovax Biotech; and Dr. Baofu Ni, Dr. Jinghua Zhao, Dr. Min You, Dr.  
29 Chunfeng Huang from Antibody Institute of Zhejiang Yangshengtang Biotech

1 Co., Ltd. for helping in the expression and purification of recombinant proteins.  
2 **Author contributions:** H.Z., Q.Y., Y.G., N.S.X. conceptualized and designed the  
3 study. S.W., K.W., Y.W., Y.Z., M.W., J.X. designed the clones, and produced and  
4 characterized the proteins. Y.W., L.Y., J.M., M.Z., C.L., W.G. performed the animal  
5 experiments. H.C., Z.L., H.Z., X.W., Y.W. performed the rhesus monkey  
6 experiments. Z.W., Y.H., D.C., M.L., H.L.G., J.G., H.X. performed the ELISA and  
7 neutralization assays. J.J.X., H.Y.G. performed ELISpot assays. J.M., P.C.  
8 performed the SARS-CoV-2 RNA quantification. M.N., Y.W. formulated the  
9 vaccines. Y.S., W.H. prepared mAbs. Q.Z. carried out the cryo-EM studies. Q.Y.,  
10 Y.W., S.W., Q.Z., Z.H. wrote the paper. S.L., T.C., T.W., Y.C., Q.Z., J.Z., T.Z., H.Z.,  
11 Y.G., N.S.X. revised the manuscript. All authors read and approved the final  
12 version of the manuscript.

13

14 **Competing interests:** Q.Y., Y.W., S.W., Y.Z., M.W., K.W., Z.W., J.X., T.Z., J.Z.  
15 and N.S.X. are coinventors on a patent in the application for the spike  
16 constructs and their applications described in this study. The other authors  
17 declare no competing interests

18 **Data and materials availability:** Structure coordinates are deposited in the  
19 Protein Data Bank under accession codes 7WP6 (STKF:36H6:83H7:85F7) and  
20 7WP8 (STFK1628x:83H7:85F7:2B4). The corresponding EM density maps  
21 have been deposited in the Protein Data Bank under accession numbers EMD-  
22 32676 (STKF:36H6:83H7:85F7), EMD-32678 (STFK1628x:83H7:85F7:2B4).  
23 All data associated with this study are present in the paper or the  
24 Supplementary Materials. Reagents will be made available to the scientific  
25 community by contacting N.S.X. or Q.Y. and completing a materials transfer  
26 agreement.

27

28

# References

1. W. T. Harvey *et al.*, SARS-CoV-2 variants, spike mutations and immune escape. *Nature reviews. Microbiology* **19**, 409-424 (2021).
2. P. Wang *et al.*, Antibody Resistance of SARS-CoV-2 Variants B.1.351 and B.1.1.7. *bioRxiv*, 2021.2001.2025.428137 (2021).
3. P. Wang *et al.*, Increased resistance of SARS-CoV-2 variant P.1 to antibody neutralization. *Cell host & microbe* **29**, 747-751.e744 (2021).
4. K. Uriu *et al.*, Neutralization of the SARS-CoV-2 Mu Variant by Convalescent and Vaccine Serum. *N Engl J Med*, (2021).
5. S. Cele *et al.*, SARS-CoV-2 Omicron has extensive but incomplete escape of Pfizer BNT162b2 elicited neutralization and requires ACE2 for infection. *medRxiv*, 2021.2012.2008.21267417 (2021).
6. A. Wilhelm *et al.*, Reduced Neutralization of SARS-CoV-2 Omicron Variant by Vaccine Sera and Monoclonal Antibodies. *medRxiv*, 2021.2012.2007.21267432 (2021).
7. W. F. Garcia-Beltran *et al.*, mRNA-based COVID-19 vaccine boosters induce neutralizing immunity against SARS-CoV-2 Omicron variant. *medRxiv*, 2021.2012.2014.21267755 (2021).
8. L. Liu *et al.*, Striking Antibody Evasion Manifested by the Omicron Variant of SARS-CoV-2. *bioRxiv*, 2021.2012.2014.472719 (2021).
9. D. Planas *et al.*, Considerable escape of SARS-CoV-2 variant Omicron to antibody neutralization. *bioRxiv*, 2021.2012.2014.472630 (2021).
10. S. A. Madhi *et al.*, Efficacy of the ChAdOx1 nCoV-19 Covid-19 Vaccine against the B.1.351 Variant. *N Engl J Med* **384**, 1885-1898 (2021).
11. N. Andrews *et al.*, Effectiveness of COVID-19 vaccines against the Omicron (B.1.1.529) variant of concern. *medRxiv*, 2021.2012.2014.21267615 (2021).
12. BioNTech. (2021), vol. 2022.
13. Moderna. (2021), vol. 2022.
14. J. G. Liang *et al.*, S-Trimer, a COVID-19 subunit vaccine candidate, induces protective immunity in nonhuman primates. *Nat Commun* **12**, 1346 (2021).
15. J. H. Tian *et al.*, SARS-CoV-2 spike glycoprotein vaccine candidate NVX-CoV2373 immunogenicity in baboons and protection in mice. *Nat Commun* **12**, 372 (2021).
16. P. J. M. Brouwer *et al.*, Two-component spike nanoparticle vaccine protects macaques from SARS-CoV-2 infection. *Cell* **184**, 1188-1200 e1119 (2021).
17. Y. Wu *et al.*, A recombinant spike protein subunit vaccine confers protective immunity against SARS-CoV-2 infection and transmission in hamsters. *Science translational medicine* **13**, (2021).
18. Y. Zhang *et al.*, Virus-Free and Live-Cell Visualizing SARS-CoV-2 Cell Entry for Studies of Neutralizing Antibodies and Compound Inhibitors. *Small Methods* **5**, 2001031 (2021).
19. Y. Zhang *et al.*, Cross-Species Tropism and Antigenic Landscapes of Circulating SARS-CoV-2 Variants. *SSRN*, (2021).
20. C. O. Barnes *et al.*, SARS-CoV-2 neutralizing antibody structures inform therapeutic strategies. *Nature* **588**, 682-687 (2020).
21. T. N. Starr *et al.*, SARS-CoV-2 RBD antibodies that maximize breadth and resistance to escape. *Nature* **597**, 97-102 (2021).

- 1 22. A. G. Wrobel *et al.*, Antibody-mediated disruption of the SARS-CoV-2 spike  
2 glycoprotein. *Nat Commun* **11**, 5337 (2020).
- 3 23. W. Dejnirattisai *et al.*, SARS-CoV-2 Omicron-B.1.1.529 leads to widespread escape  
4 from neutralizing antibody responses. *Cell*, (2022).
- 5 24. K. van der Straten *et al.*, Mapping the antigenic diversification of SARS-CoV-2.  
6 *medRxiv*, 2022.2001.2003.21268582 (2022).
- 7 25. M. Hoffmann *et al.*, The Omicron variant is highly resistant against antibody-mediated  
8 neutralization – implications for control of the COVID-19 pandemic. *Cell*, (2021).
- 9 26. W. F. Garcia-Beltran *et al.*, mRNA-based COVID-19 vaccine boosters induce  
10 neutralizing immunity against SARS-CoV-2 Omicron variant. *Cell*, (2022).
- 11 27. J. Ai *et al.*, Omicron variant showed lower neutralizing sensitivity than other SARS-  
12 CoV-2 variants to immune sera elicited by vaccines after boost. *Emerg Microbes Infect*,  
13 1-24 (2021).
- 14 28. K. Wu *et al.*, Variant SARS-CoV-2 mRNA vaccines confer broad neutralization as  
15 primary or booster series in mice. *Vaccine* **39**, 7394-7400 (2021).
- 16 29. B. Ying *et al.*, Protective activity of mRNA vaccines against ancestral and variant SARS-  
17 CoV-2 strains. *Science translational medicine*, eabm3302 (2021).
- 18 30. D. R. Martinez *et al.*, Chimeric spike mRNA vaccines protect against Sarbecovirus  
19 challenge in mice. *Science* **373**, 991-998 (2021).
- 20 31. W. T. Harvey *et al.*, SARS-CoV-2 variants, spike mutations and immune escape. *Nature*  
21 *reviews. Microbiology* **19**, 409-424 (2021).
- 22 32. S. Sharma *et al.*, Universal COVID-19 vaccine with updated spike antigen confers full  
23 protection against all SARS-CoV-2 variants of concern. *bioRxiv*,  
24 2021.2011.2012.468374 (2021).
- 25 33. S. Xia *et al.*, Inhibition of SARS-CoV-2 (previously 2019-nCoV) infection by a highly  
26 potent pan-coronavirus fusion inhibitor targeting its spike protein that harbors a high  
27 capacity to mediate membrane fusion. *Cell Res* **30**, 343-355 (2020).
- 28 34. H. L. Xiong *et al.*, Robust neutralization assay based on SARS-CoV-2 S-protein-  
29 bearing vesicular stomatitis virus (VSV) pseudovirus and ACE2-overexpressing BHK21  
30 cells. *Emerg Microbes Infect* **9**, 2105-2113 (2020).
- 31 35. I. Knezevic *et al.*, WHO International Standard for evaluation of the antibody response  
32 to COVID-19 vaccines: call for urgent action by the scientific community. *Lancet*  
33 *Microbe*, (2021).
- 34 36. L. Chang *et al.*, The prevalence of antibodies to SARS-CoV-2 among blood donors in  
35 China. *Nat Commun* **12**, 1383 (2021).
- 36 37. J. Li *et al.*, Safety and immunogenicity of the SARS-CoV-2 BNT162b1 mRNA vaccine  
37 in younger and older Chinese adults: a randomized, placebo-controlled, double-blind  
38 phase 1 study. *Nat Med* **27**, 1062-1070 (2021).
- 39 38. S. Q. Zheng *et al.*, MotionCor2: anisotropic correction of beam-induced motion for  
40 improved cryo-electron microscopy. *Nat Methods* **14**, 331-332 (2017).
- 41 39. K. Zhang, Gctf: Real-time CTF determination and correction. *J Struct Biol* **193**, 1-12  
42 (2016).
- 43 40. A. Punjani, J. L. Rubinstein, D. J. Fleet, M. A. Brubaker, cryoSPARC: algorithms for  
44 rapid unsupervised cryo-EM structure determination. *Nat Methods* **14**, 290-296 (2017).

- 1 41. A. Kucukelbir, F. J. Sigworth, H. D. Tagare, Quantifying the local resolution of cryo-EM  
2 density maps. *Nat Methods* **11**, 63-65 (2014).
- 3 42. D. Wrapp *et al.*, Cryo-EM structure of the 2019-nCoV spike in the prefusion  
4 conformation. *Science* **367**, 1260-1263 (2020).
- 5 43. E. F. Pettersen *et al.*, UCSF Chimera--a visualization system for exploratory research  
6 and analysis. *J Comput Chem* **25**, 1605-1612 (2004).
- 7 44. P. Emsley, K. Cowtan, Coot: model-building tools for molecular graphics. *Acta*  
8 *Crystallogr D Biol Crystallogr* **60**, 2126-2132 (2004).
- 9 45. P. D. Adams *et al.*, PHENIX: a comprehensive Python-based system for  
10 macromolecular structure solution. *Acta Crystallogr D Biol Crystallogr* **66**, 213-221  
11 (2010).
- 12 46. X. Robert, P. Gouet, Deciphering key features in protein structures with the new  
13 ENDscript server. *Nucleic Acids Res* **42**, W320-324 (2014).
- 14 47. V. B. Chen *et al.*, MolProbity: all-atom structure validation for macromolecular  
15 crystallography. *Acta Crystallogr D Biol Crystallogr* **66**, 12-21 (2010).
- 16 48. E. F. Pettersen *et al.*, UCSF ChimeraX: Structure visualization for researchers,  
17 educators, and developers. *Protein Sci* **30**, 70-82 (2021).
- 18 49. L. Yuan *et al.*, Gender associates with both susceptibility to infection and pathogenesis  
19 of SARS-CoV-2 in Syrian hamster. *Signal Transduct Target Ther* **6**, 136 (2021).

20

21

22

**Figure 1**

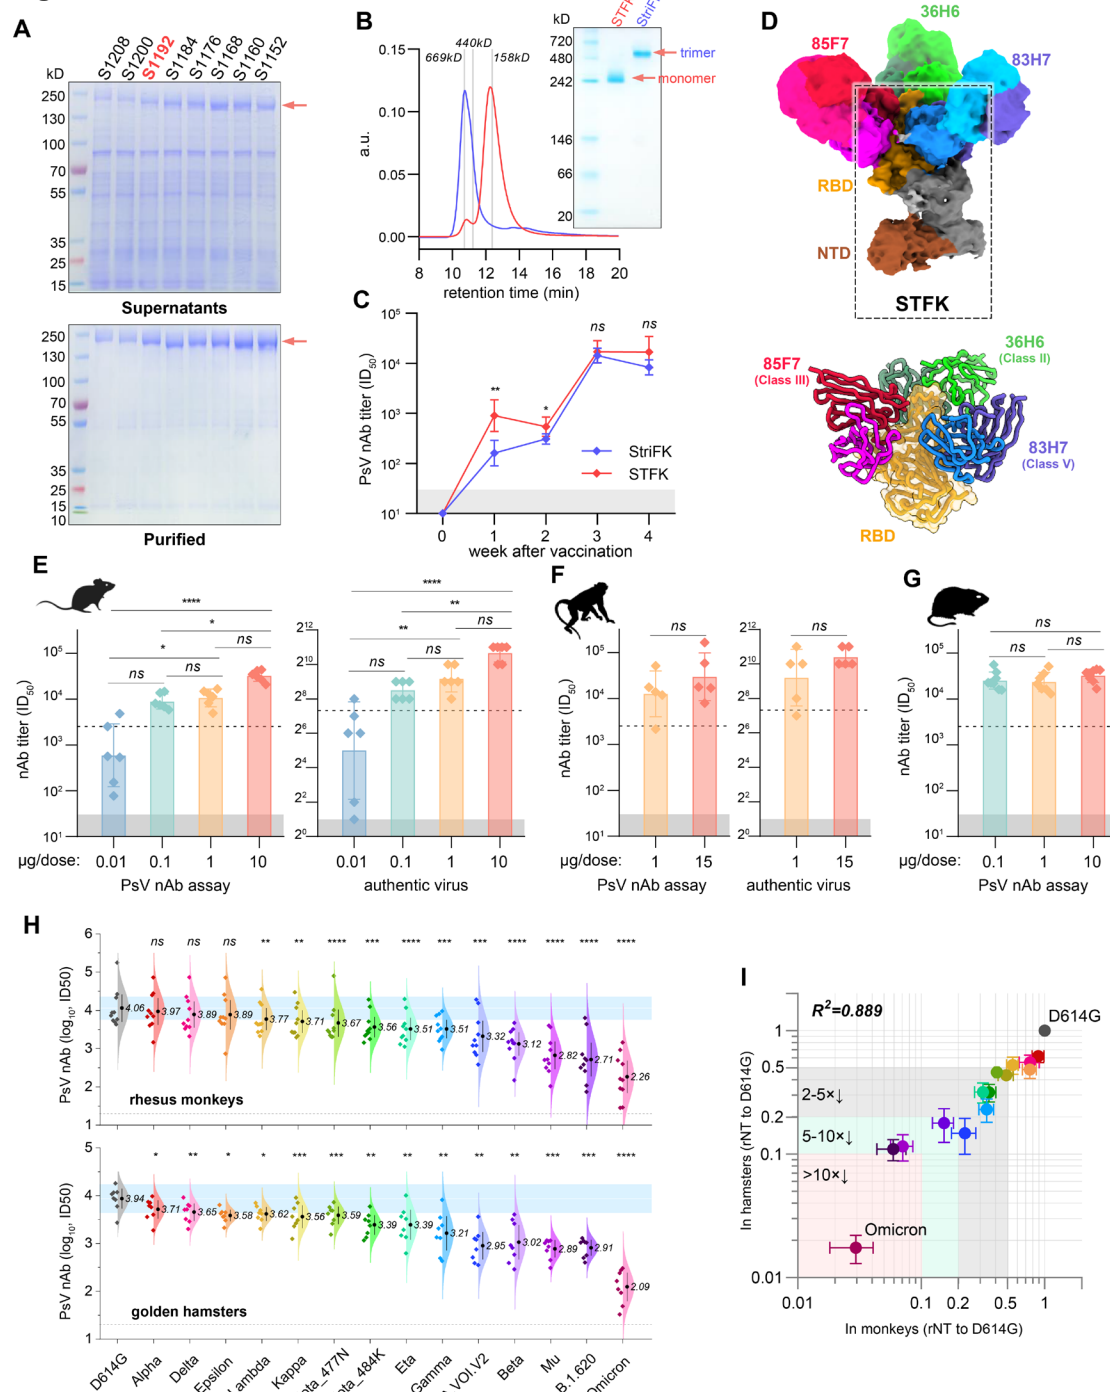

**Fig. 1. The monomeric STFK is highly immunogenic in rodents and nonhuman primates. (A)** Reduced SDS-PAGE analyses for supernatants (top panel) and purified proteins (bottom panel) produced from constructs encoding progressive truncations from the C terminus of the furin site with mutated spike ectodomain in CHO cells. S1208, aa 1-1208; S1200, aa 1-1200; S1192, aa 1-1192; S1184, aa 1-1184; S1176, aa 1-1176; S1168, aa 1-1168; S1160, aa 1-



1 1160; S1152, aa 1-1152. **(B)** Analyses of the monomeric STFK (aa 1-1192) and  
2 trimeric StrFK by SEC-HPLC (left panel) and Native-PAGE (right panel). **(C)**  
3 Comparison of the PsV nAb titers elicited by the STFK and StrFK in mice.  
4 BALB/c mice were immunized twice with 1 µg antigen at weeks 0 and 2. **(D)**  
5 3.81 Å cryo-EM density map and corresponding atomic model of the STFK in  
6 complex of nAbs 36H6, 83H7, and 85F7. The black dotted box highlights the  
7 monomeric STFK protein. **(E-G)** Serum nAb titers against pseudotyped (left  
8 panel) and authentic SARS-CoV-2 viruses (right panel) of **(E)** BALB/c mice (n=6)  
9 or **(F)** Rhesus monkeys (n=5) received 2 shots of STFK vaccinations at different  
10 antigen doses. **(G)** Serum nAb titers against VSV-based PsV of hamsters  
11 vaccinated at 0.1 (n=8), 1 (n=7), or 10 µg (n=8) of STFK per dose. The  
12 immunization schedule was week 0/3 for **(E, G)** and week 0/4 for **(F)**. Sera were  
13 analyzed at weeks 4 **(E)**, 6 **(F)**, and 5 **(G)**. The dotted lines show the PsV nAb  
14 titers of WHO International Standard for anti-SARS-CoV-2 immunoglobulin  
15 using the same assays (NIBSC 20/136). **(H)** The nAb titers of sera from STFK-  
16 vaccinated rhesus monkeys (pooled of 1 and 15 µg groups, top panel) and  
17 hamsters (10 µg group, bottom panel) against lentiviral-pseudotyped SARS-  
18 CoV-2 spike variants compared to that against the ancestral D614G strain. The  
19 numbers showed the nAb GMT (log<sub>10</sub>) values. **(I)** Comparison of the cross-  
20 neutralizing activities of vaccinated hamsters (X-axis) and rhesus monkeys (Y-  
21 axis) against various lentiviral-pseudotyped SARS-CoV-2 variants. The relative  
22 nAb titer (rNT) was calculated as its ID<sub>50</sub> ratio against a variant to the D614G  
23 control for each sample. Data in (D-H) were plotted as the geometric mean with  
24 SD. Dark shadows in (D-G) indicate the limit of detection (LOD). The dotted line  
25 in (H) indicates the LOD. Blue shadows in (H) represent the range of 50%-200%  
26 (within 2-fold changes) of the nAb GMT against D614G (as white line indicated).  
27 Uncorrected Kruskal-Wallis test (D, E, and G), Mann-Whitney *U* test (F), or  
28 Dunnett's Multiple Comparison test (H) were used for intergroup statistical  
29 comparisons. Asterisks indicate statistical significance (\*\*\*\**P* < 0.0001; \*\*\**P* <



- 1 0.001; \*\* $P < 0.01$ ; \* $P < 0.05$ ; ns, not significant). Silhouettes indicating the
- 2 species in (E-G) were from PhyloPic.org and available under the Public Domain
- 3 Dedication 1.0 license.

**Figure 2**

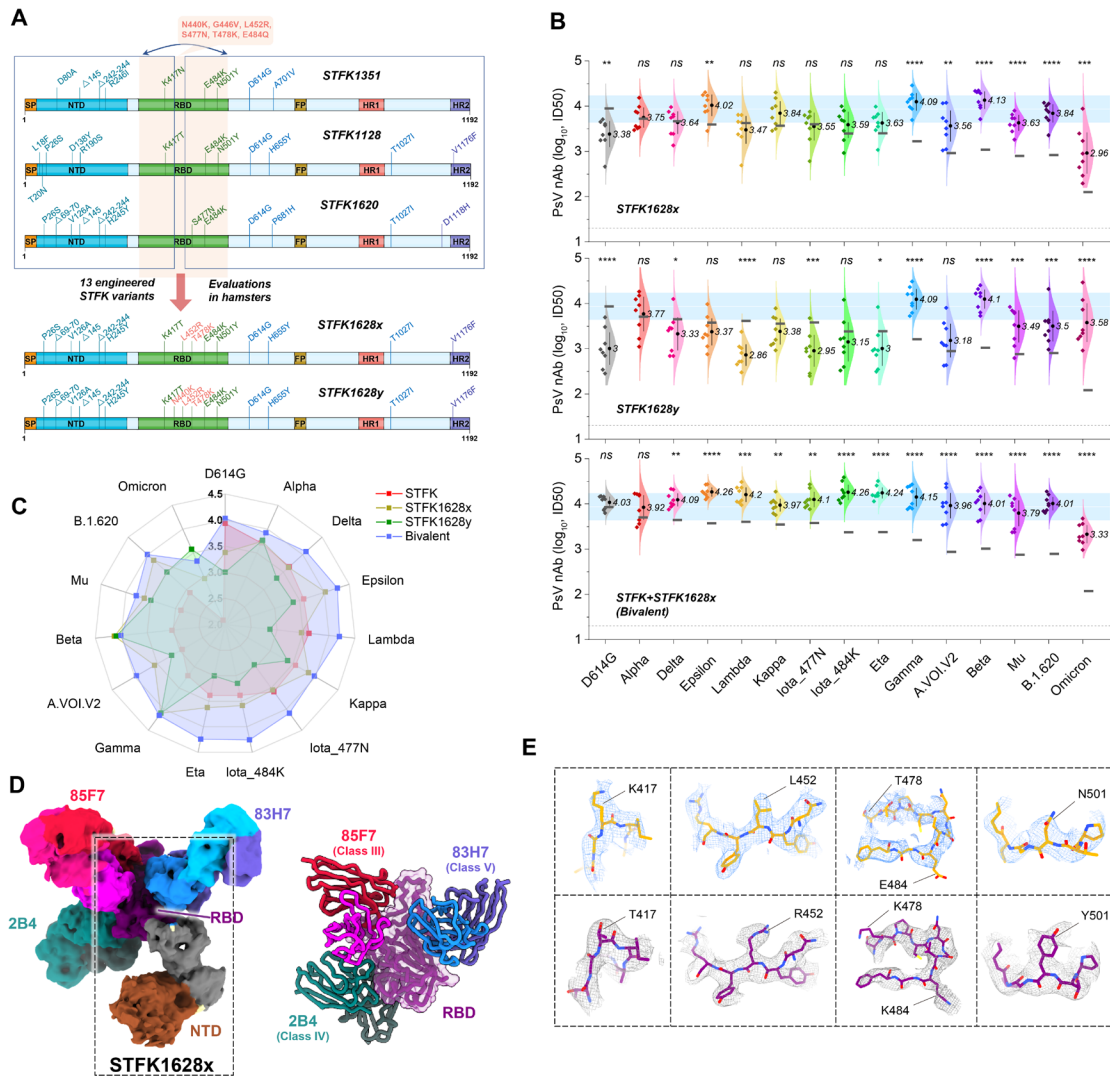

**Fig. 2. Neutralizing antibody responses elicited by engineered STFK variants in hamsters. (A)** Schematic of the progressive approach to enlarge the cross-variants antigenic covering of a recombinant spike protein via inter-lineage chimera and mutation patch strategies. **(B)** The nAb titers of sera from hamsters (n=8) receiving vaccination of STFK1628x, STFK1628y, or a bivalent version of STFK+STFK1628x to neutralize lentiviral-pseudotyped SARS-CoV-2 variants. Dark horizontal lines indicate the nAb GMTs induced by the prototypic STFK vaccine against the corresponding variants. Blue shadows represent the range of 50%-200% (within 2-fold changes) of the nAb GMT against D614G (as white line indicated) induced by prototypic STFK. Dotted lines indicate the LOD (ID<sub>50</sub>=20) of the assay. Data were plotted as the

1 geometric mean with SD. Uncorrected Fisher's LSD tests were used for  
2 statistical comparisons (STFK v.s. modified STFK vaccine). Asterisks indicate  
3 statistical significance (\*\*\*\* $P < 0.0001$ ; \*\*\* $P < 0.001$ ; \*\* $P < 0.01$ ; \* $P < 0.05$ ; ns,  
4 not significant). **(C)** A spider plot showed the nAb GMTs ( $\log_{10}$ ) against different  
5 SARS-CoV-2 variants of hamsters immunized with STFK, STFK1628x,  
6 STFK1628y, or the bivalent vaccine. Data were summarized from panel (B). **(D)**  
7 3.88 Å cryo-EM density map and corresponding atomic model of the  
8 STFK1628x in complex of nAbs 83H7, 85F7, and 2B4. The black dotted box  
9 highlights the monomeric STFK1628x protein. **(E)** Comparisons of  
10 representative density maps of residues involved in RBD mutations on the  
11 STKF (top panel) and STFK1628x proteins (bottom panel).

12

**Figure 3**

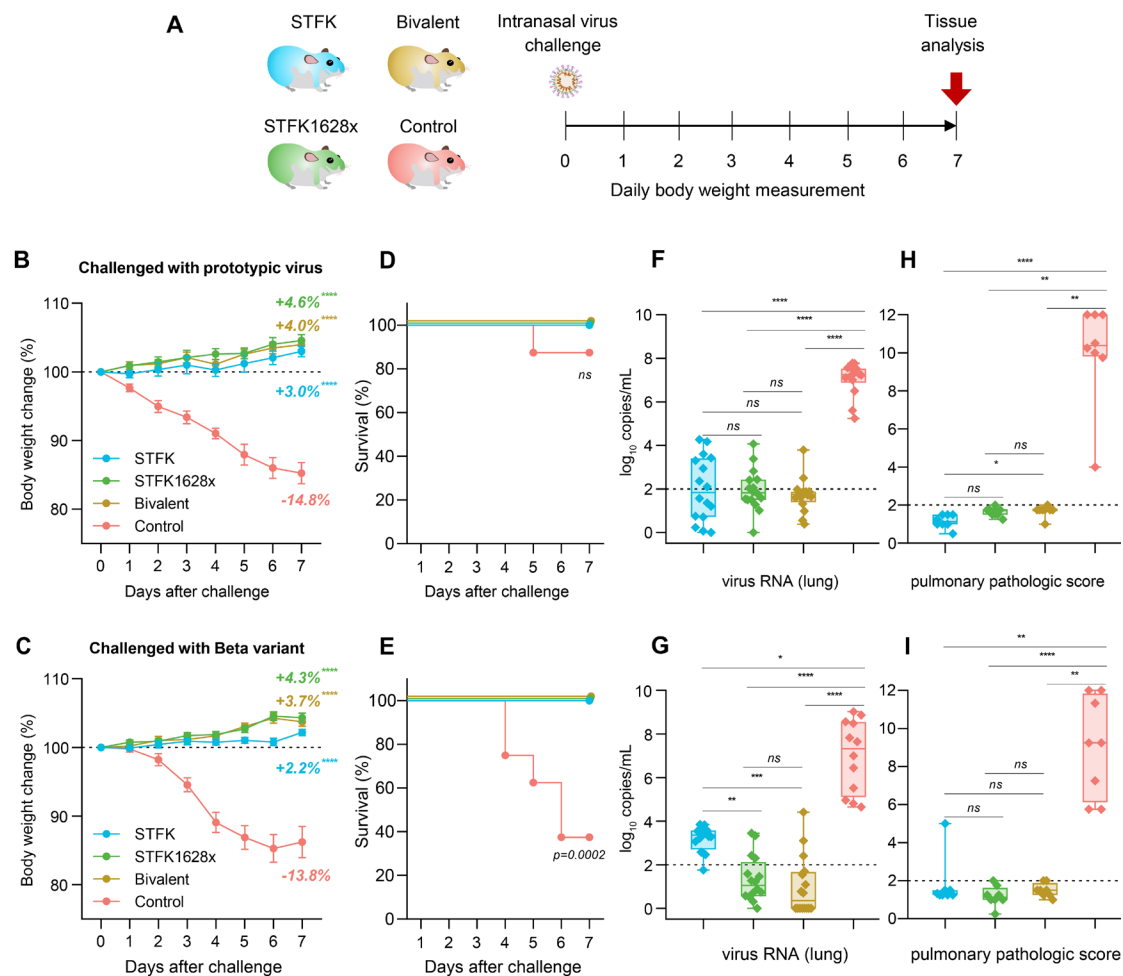

**Fig. 3. The STFK, STFK1628x, and bivalent vaccines offer protection against ancestral SARS-CoV-2 and Beta variant intranasally challenged in hamsters. (A)** Schematic representation of the intranasal virus challenge evaluation for vaccine effectiveness. A total of 64 hamsters were used for two independent tests. Each group (indicated in different colors) included eight hamsters (4 males and 4 females) that received 2-dose vaccinations (at weeks 0/3) before virus challenges. Hamsters were intranasally challenged with  $1 \times 10^4$  PFU of ancestral SARS-CoV-2 or Beta variant (B.1.351) at week 5. After a 7-day weight monitoring follow-up, animals were euthanized for tissue analyses. Weight changes (**B, C**), survival curves (**D, E**), lung viral RNA levels (in two independent lung tissues, LOD=2  $\log_{10}$  copies/mL) (**F, G**), and pulmonary pathological scores (**H, I**) of hamsters challenged by ancestral SARS-CoV-2 (**B, D, F, H**) or beta variant (**C, E, G, I**) were shown. Data in (**B, C**) were plotted as

1 means±SEM. Data in (**F-I**) were shown as box and whisker plots; the median,  
 2 first quartile, third quartile, minimum, and maximum values were plotted.  
 3 Dunnett's Multiple Comparison test (**B, C**), two-sided log-rank test (**D, E**), or  
 4 uncorrected Kruskal-Wallis test (**F-I**) were used for intergroup statistical  
 5 comparisons. Asterisks indicate statistical significance (\*\*\*\* $P < 0.0001$ ; \*\*\* $P <$   
 6  $0.001$ ; \*\* $P < 0.01$ ; \* $P < 0.05$ ; ns, not significant).  
 7

**Figure 4**

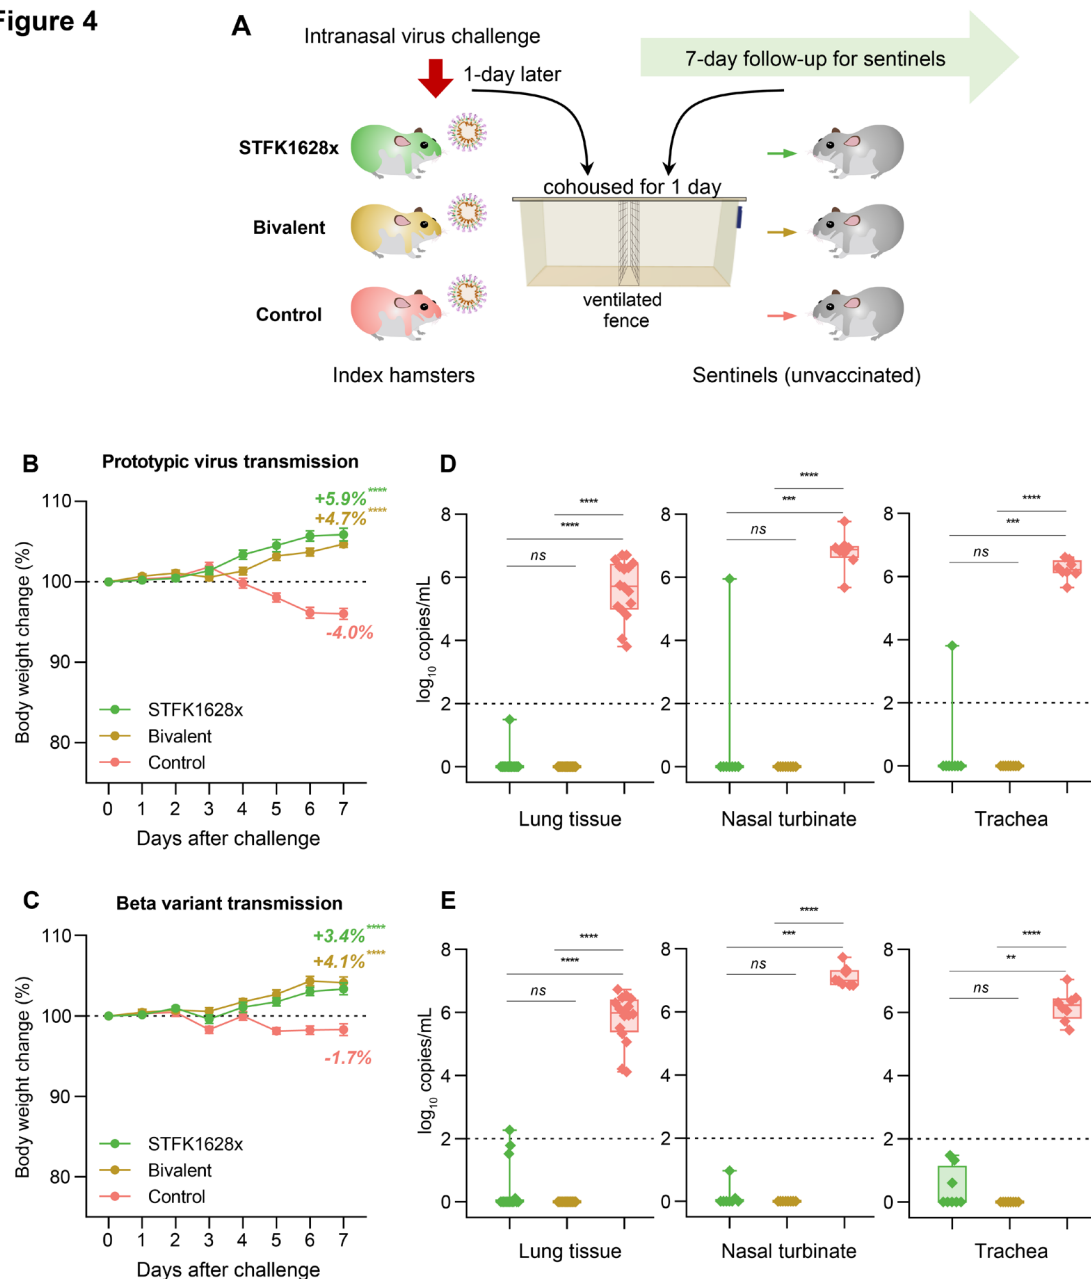

**Fig. 4. The monovalent STFK1628x and the STFK/STFK1628x-combined bivalent vaccines prevent SARS-CoV-2 transmission among hamsters. (A)**

Schematic diagram of the experimental design. Vaccinated- (STFK1628x or bivalent vaccine) and unvaccinated-index hamsters (n=4) were intranasally challenged with  $1 \times 10^4$  PFU of ancestral SARS-CoV-2 or Beta variant. One day later, each 2 index hamsters were cohoused with 4 naïve sentinels for one day (separated by a double-layer ventilated fence in the same cage). Sentinel hamsters (n=8) were followed for 7-day and then euthanized for tissue analyses.

Weight changes (**B, C**) and viral RNA levels in the respiratory tract tissues (**D,**

1 **E**) of sentinels after cohoused with index hamsters challenged by ancestral  
2 SARS-CoV-2 (**B, D**) or beta variant (**C, E**) were shown. Viral RNA levels in  
3 tissues of the lung (in two independent tissues), nasal turbinate, and trachea  
4 were measured by qRT-PCR (LOD=2 log<sub>10</sub> copies/mL). Data in (B and D) were  
5 plotted as means ± SEM. Data in (C and E) were shown as box and whisker  
6 plots; median, first quartile, third quartile, minimum value, and maximum value  
7 were plotted. Dunnett's Multiple Comparison test (**B, C**), or uncorrected  
8 Kruskal-Wallis test (**D, E**) were used for intergroup statistical comparisons, and  
9 asterisks indicate statistical significance (\*\*\*\**P* < 0.0001; \*\*\**P* < 0.001; \*\**P* <  
10 0.01; \**P* < 0.05; ns, not significant).

11



**Figure S1**

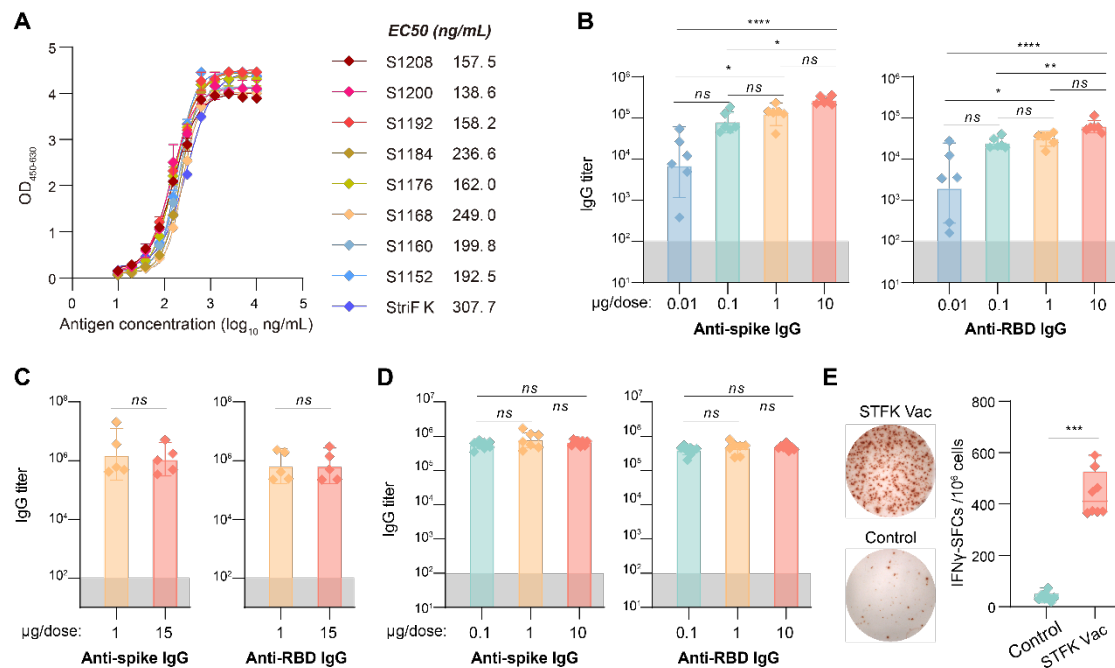

**fig. S1. Evaluations for the recombinant STFK for *in vitro* binding with human rACE2 and *in vivo* immunogenicity.** (A) ELISA-binding activities of recombinant spike proteins with human rACE2. (B-D) Anti-Spike and anti-RBD IgG titers in STFK-immunized (B) BALB/c mice, (C) rhesus monkeys, and (D) hamsters. (E) Spike-specific T cell response elicited by STFK-vaccination in C57BL/6 mice measured by ELISpot assays. Representative images (right panel) and the counts of IFN-γ spot-forming cells (left panel) were shown. Data in (B-D) were plotted as the geometric mean with SD. Data in (E) were shown as box and whisker plots; median, first quartile, third quartile, minimum value, and maximum value were plotted. Dark shadows in (B-D) indicate the LOD. Uncorrected Kruskal-Wallis test (B, D) or Mann-Whitney *U* test (C, E) were used for intergroup statistical comparisons. Asterisks indicate statistical significance (\*\*\*\**P* < 0.0001; \*\*\**P* < 0.001; \*\**P* < 0.01; \**P* < 0.05; ns, not significant).

**Figure S2**

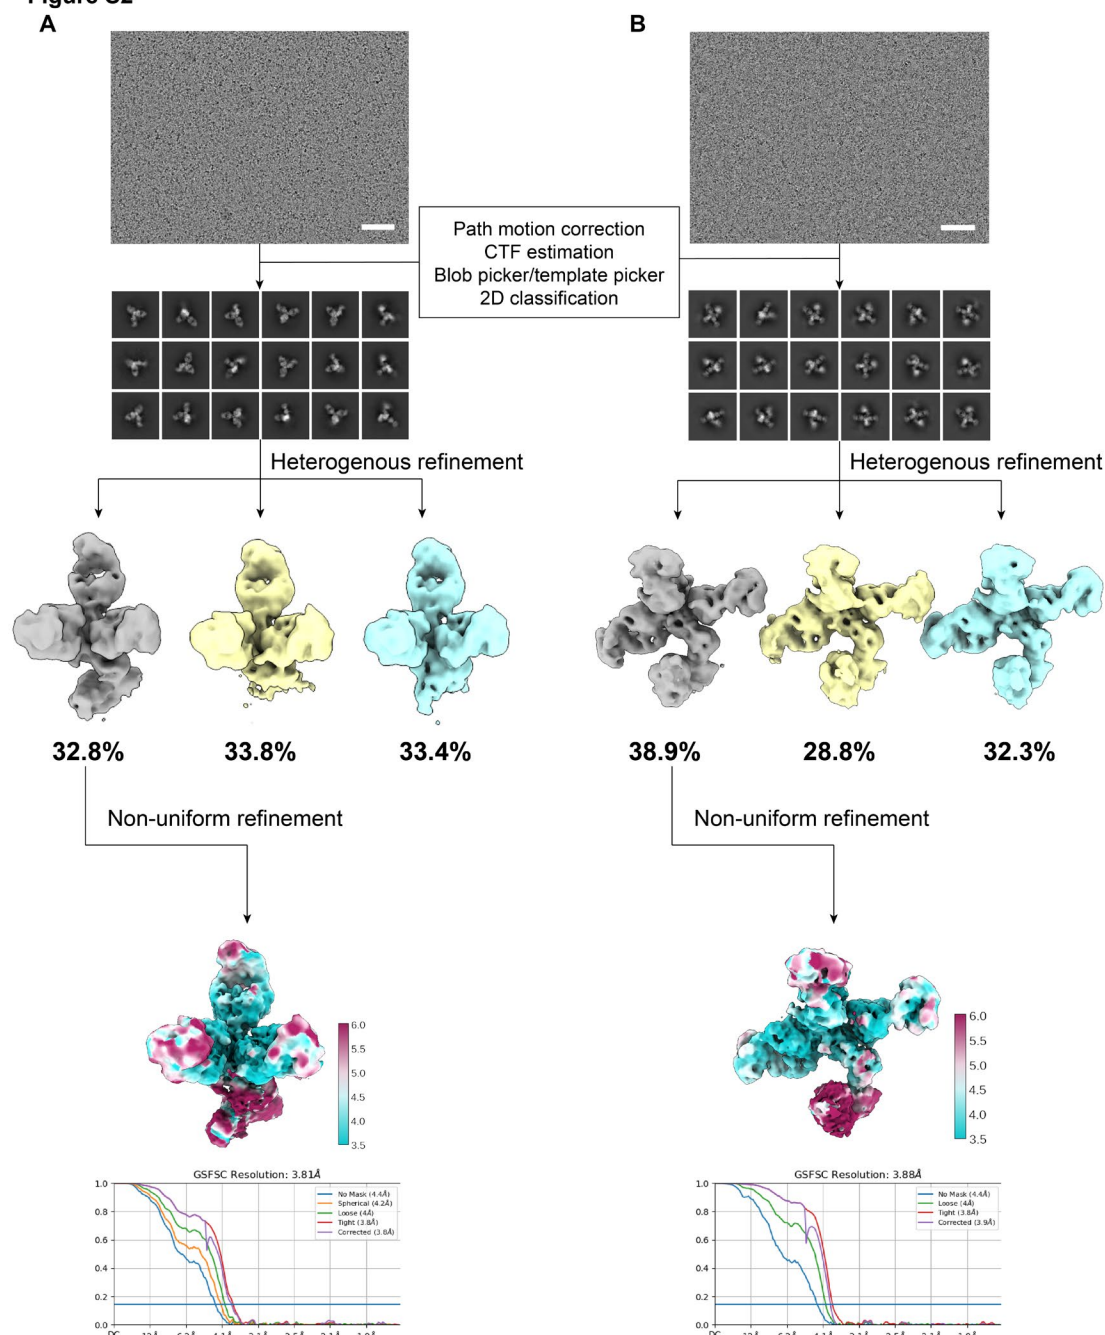

**fig. S2. Flowcharts of cryo-EM images processing and 3D reconstructions of STFK:36H6:83H7:85F7 (A) and STFK1628x:83H7:85F7:2B4 (B). Fourier shell correlation (FSC) curves and local resolution analysis of 3D and reconstructions are shown, scale bar=50 nm.**

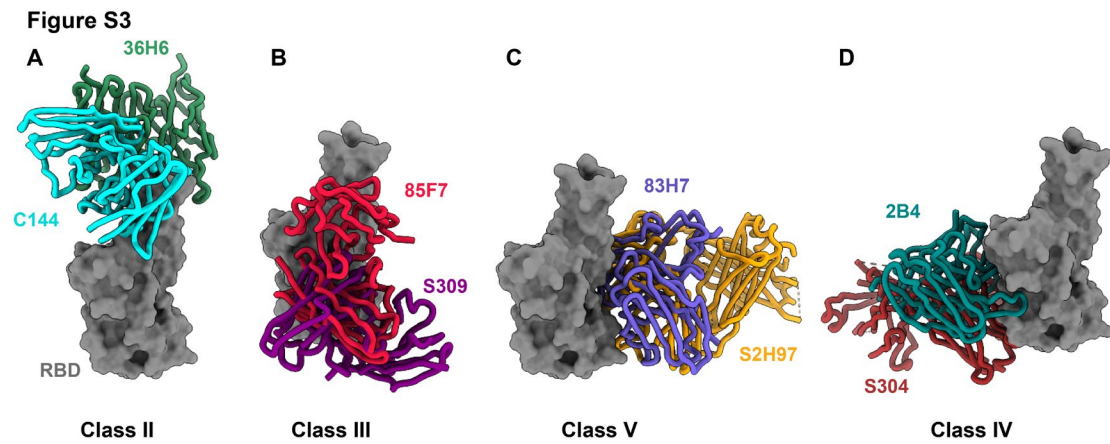

**fig. S3. Comparison and classification of nAbs by their binding epitopes and modes.** 36H6 (A), 85F7 (B), 83H7 (C), and 2B4 (D) were grouped into Class II, III, IV, and V nAbs, and their binding modes are similar to reported nAbs C144 (Class II, pdb no. 7K90), S309 (Class III, pdb no. 7R6W), S2H97 (Class V, pdb no. 7M7W) and S304 (Class IV, pdb no. 7R6X), respectively.

**Figure S4**

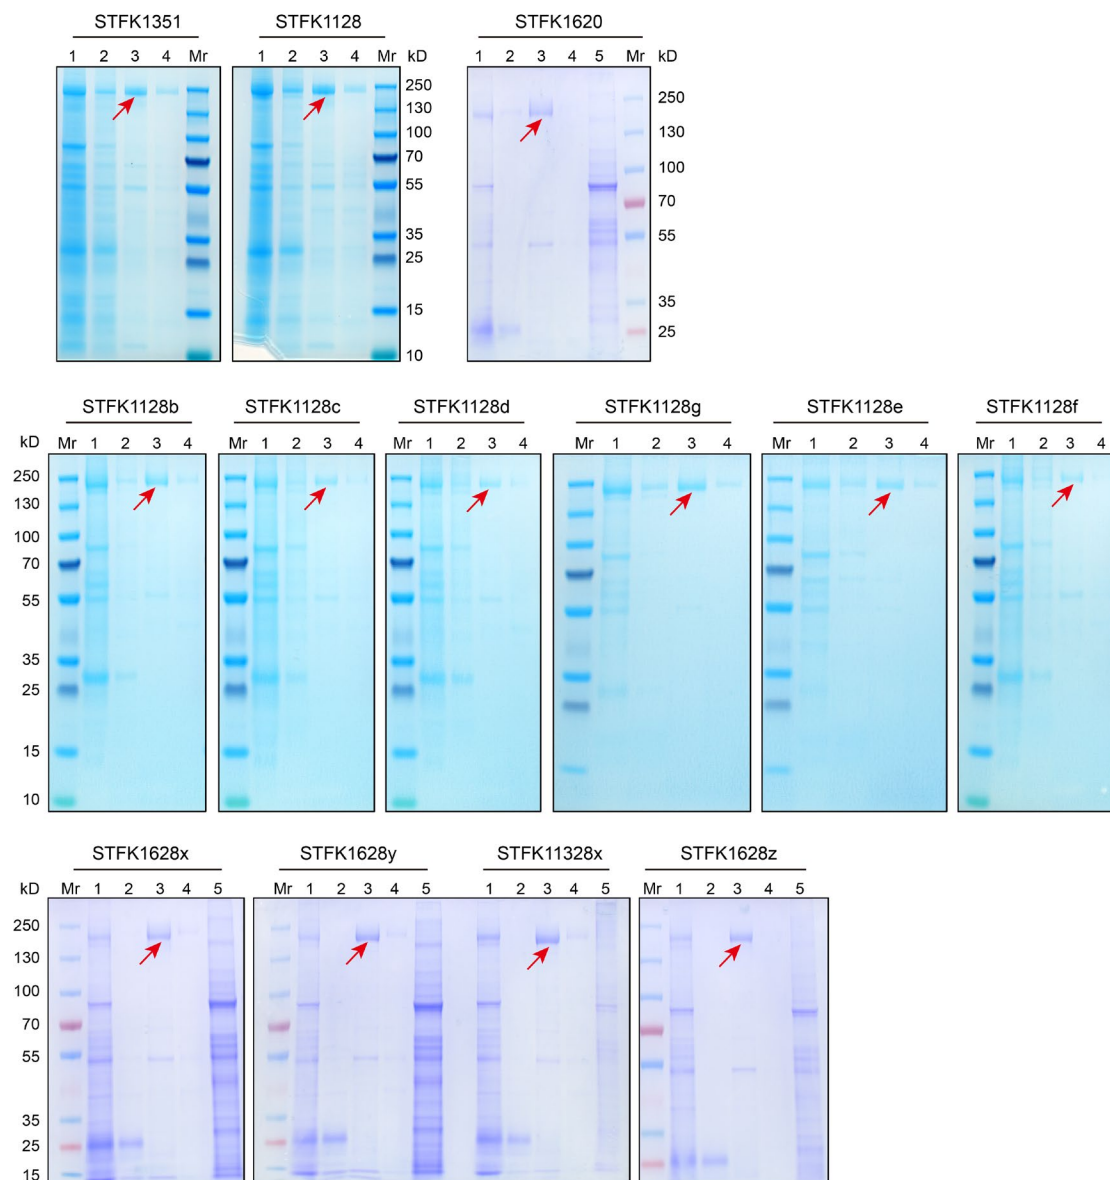

**fig. S4. SDS-PAGE analyses for engineered STFK variants.** Mr, protein ladder; lane 1, supernatants of transfected cells; lane 2, flow-through fraction from the Q-FF column; lane 3-4, the eluate fractions with buffer containing 100 mM NaCl; lane 5, eluate fraction with buffer containing 2 M NaCl. The red arrow indicates the target protein band.

**Figure S5**

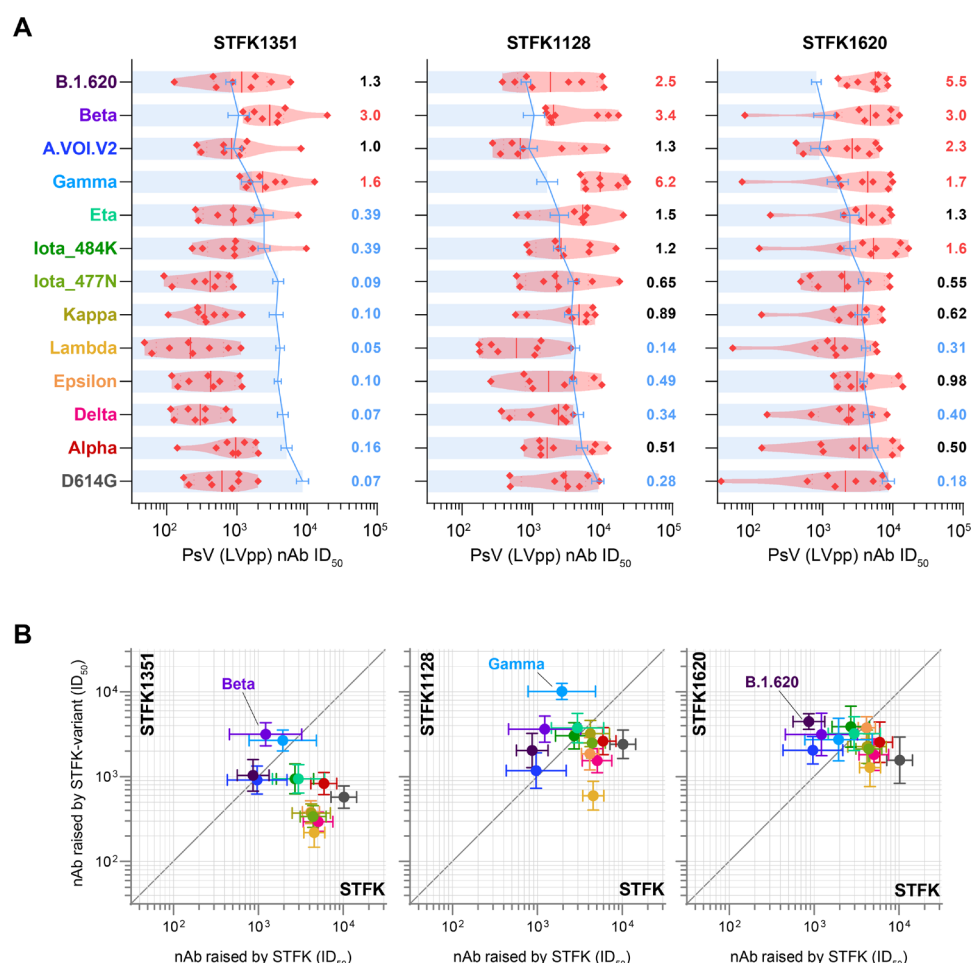

**fig. S5. Neutralizing antibody responses elicited by STFK1351, STFK1128, and STFK1620 in hamsters. (A)** The nAb titers of sera from hamsters (n=8) receiving vaccination of STFK1351, STFK1128, and STFK1620 to neutralize lentiviral-pseudotyped SARS-CoV-2 variants. The blue lines (bars) indicate the nAb GMTs ( $\pm$ SD) induced by the prototypic STFK vaccine against the corresponding variants. The numbers on the right represent the GMT fold-changes of nAb titers elicited by STFK variants to the prototypic STFK. The fold-changes were colored according to the values: <0.5 was in blue, 0.5-1.5 was in black, and >1.5 was in red. **(B)** The scatter plots compare the cross-neutralizing activities of nAbs raised by STFK variants (Y-axis) and prototypic STFK (X-axis). Data were plotted as the geometric mean with SEM. The diagonal line was Y=X.



**Figure S6**

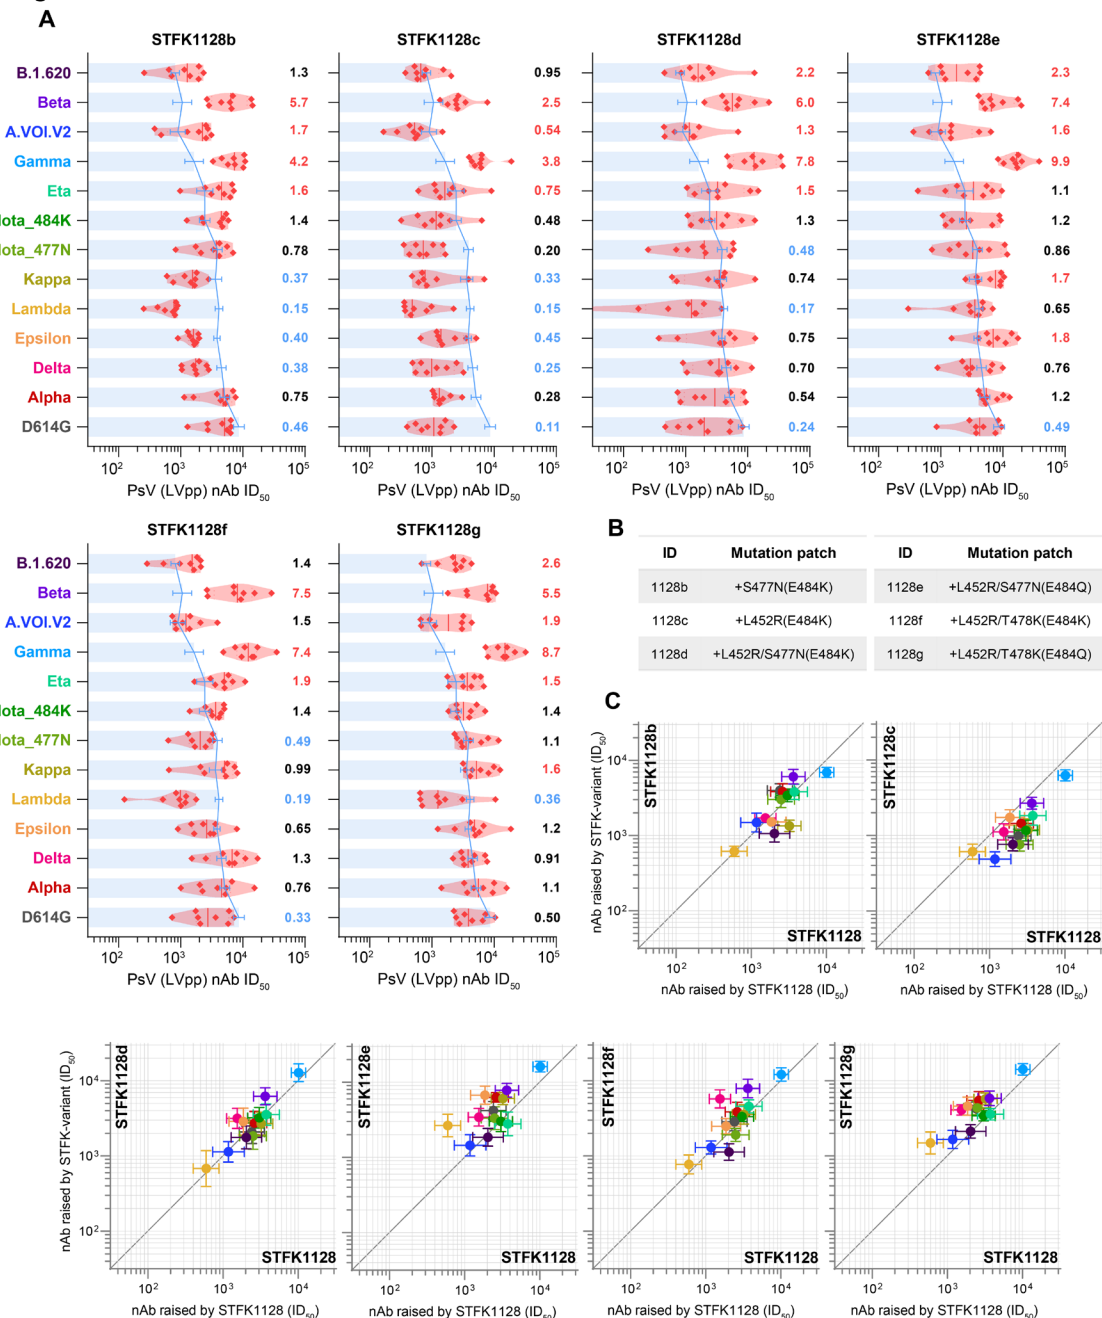

1  
2 **fig. S6. Neutralizing antibody responses elicited by STFK1128 derivatives**  
3 **in hamsters. (A)** The nAb titers of sera from hamsters (n=8) receiving  
4 vaccination of six STFK1128 derivatives **(B)** to neutralize lentiviral-pseudotyped  
5 SARS-CoV-2 variants. The blue lines (bars) indicate the nAb GMTs ( $\pm$ SD)  
6 induced by the prototypic STFK vaccine against the corresponding variants.  
7 The numbers on the right represent the GMT fold-changes of nAb titers elicited  
8 by STFK variants to the prototypic STFK. The fold-changes were colored

1 according to the values:  $<0.5$  was in blue,  $0.5-1.5$  was in black, and  $>1.5$  was  
2 in red. **(B)** Additional mutation patches in STFK1128 derivatives compared to its  
3 parental construct. **(C)** The scatter plots show the comparison of nAbs against  
4 13 variants raised by STFK1128 derivatives (Y-axis) and their parental STFK1128  
5 (X-axis). Data were plotted as the geometric mean with SEM. The diagonal line  
6 was  $Y=X$ .  
7



**Figure S7**

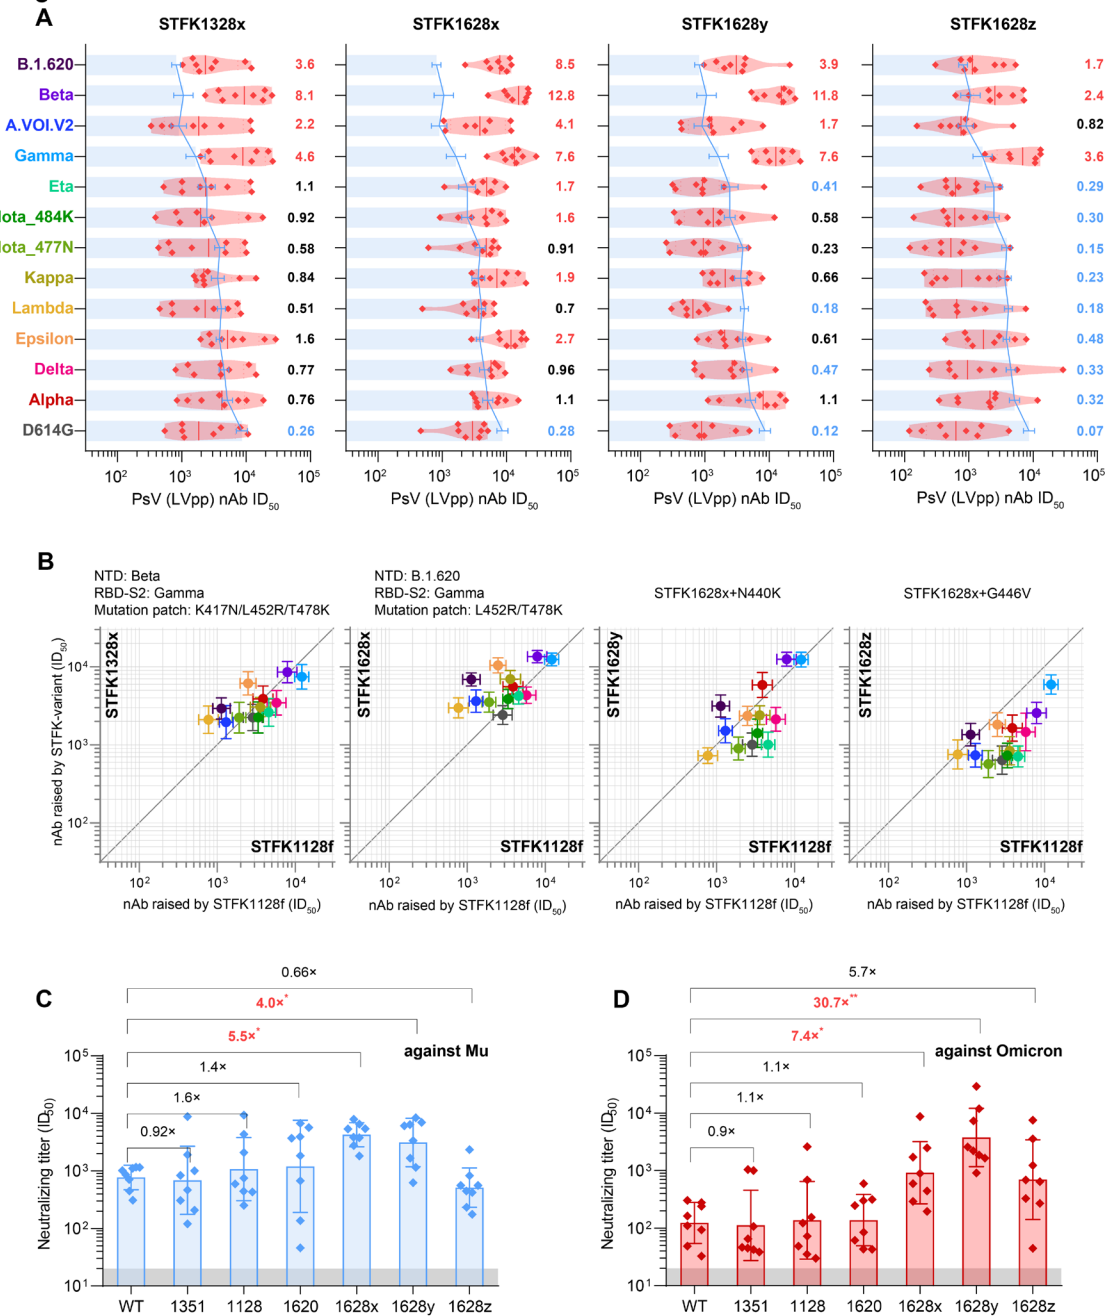

**fig. S7. Neutralizing antibody responses elicited by inter-lineage chimeric STFK variants in hamsters. (A)** The nAb titers of sera from hamsters (n=8) receiving vaccination of four STFK1128f-derived chimeric STFK variants to neutralize lentiviral-pseudotyped SARS-CoV-2 variants. The blue lines (bars) indicate the nAb GMTs ( $\pm$ SD) induced by the prototypic STFK vaccine against the corresponding variants. The numbers on the right represent the GMT fold-changes of nAb titers elicited by the chimeric STFK variants to the prototypic

1 STFK. The fold-changes were colored according to the values: <0.5 was in blue,  
2 0.5-1.5 was in black, and >1.5 was in red. **(B)** The scatter plots compare the  
3 cross-neutralizing activities of nAbs raised by chimeric STFK variants (Y-axis)  
4 and their parental STFK1128f (X-axis). Data were plotted as the geometric  
5 mean with SEM. The diagonal line was Y=X. A detailed information summary  
6 of each chimeric variant was shown on the top of the panels. **(C, D)** The nAb  
7 titers against the newly emerged variants of Mu **(C)** and Omicron **(D)** were  
8 elicited by the engineered chimeric STFK variants in comparison to STFK  
9 antigens based on naturally occurring variants. The numbers on the top of  
10 panels represent the relative nAb GMT changes induced by the STFK variants  
11 to the prototypic STFK. Dark shadows indicate the LOD. Uncorrected Kruskal-  
12 Wallis tests were used for statistical comparison. Asterisks indicate statistical  
13 significance (\*\*\*\* $P < 0.0001$ ; \*\*\* $P < 0.001$ ; \*\* $P < 0.01$ ; \* $P < 0.05$ ; ns, not  
14 significant).

15

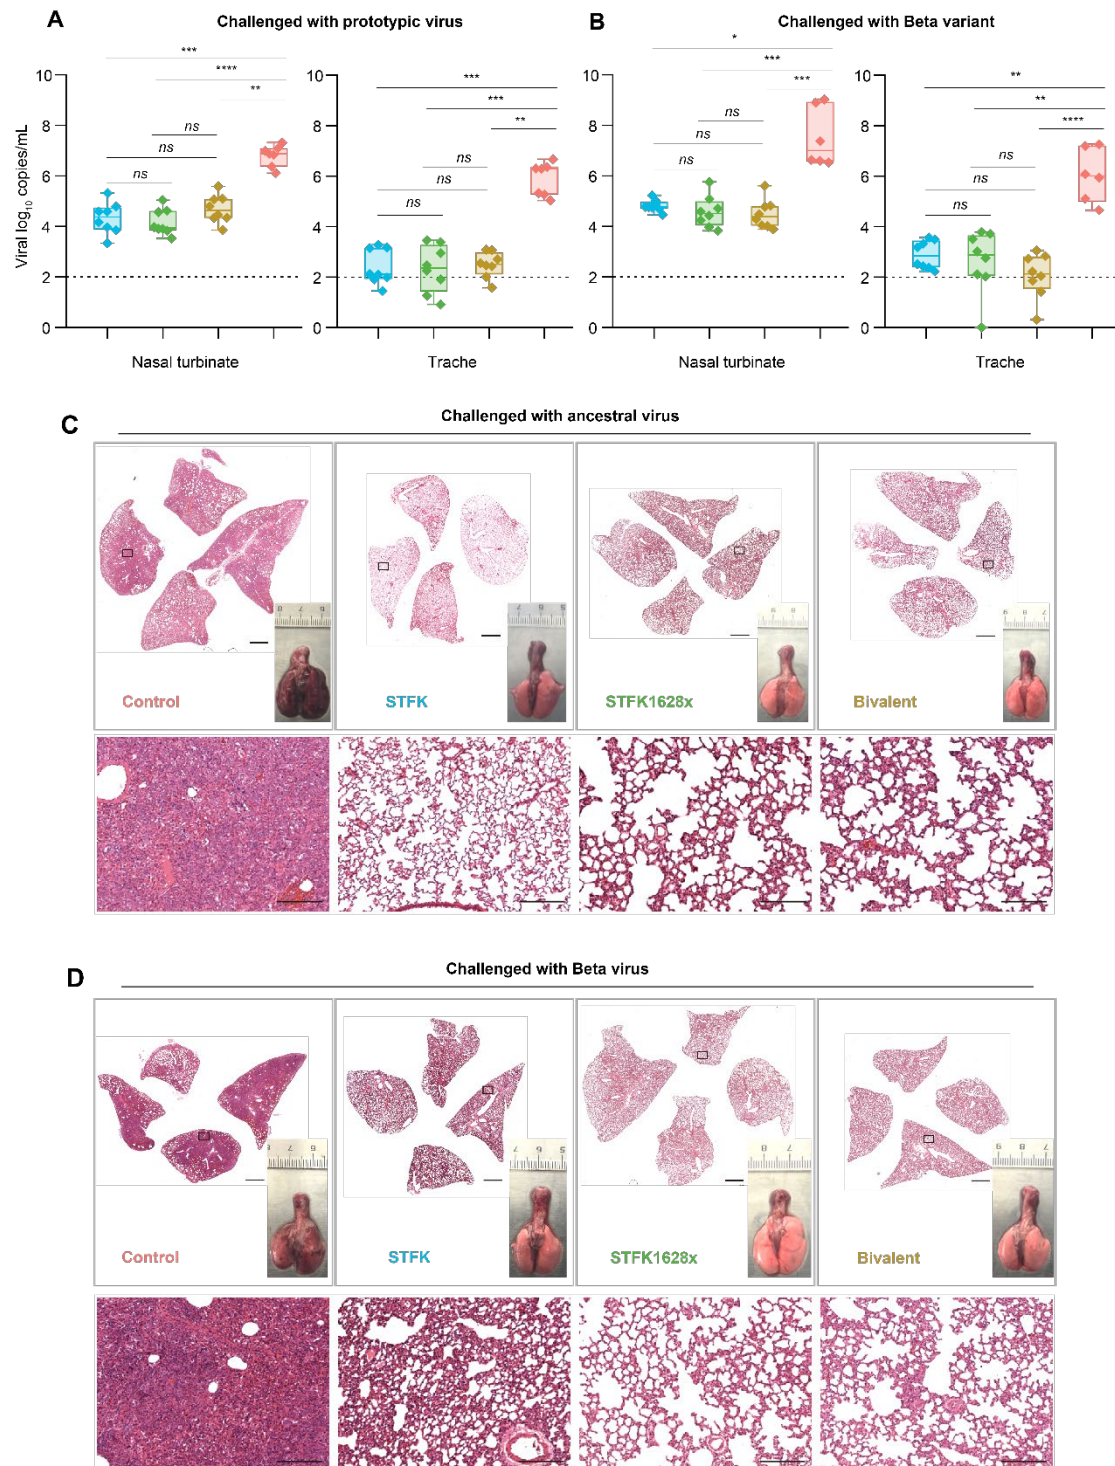

**fig. S8. Tissue analyses for hamsters intranasally challenged with SARS-CoV-2.** Animals were identical to that shown in Fig. 3. **(A-B)** Viral RNA levels in tissues of nasal turbinate (left panel) and trachea (right panel) collected from hamsters challenged with ancestral SARS-CoV-2 **(A)** or Beta variant **(B)**. **(C-D)** Representative H&E-stained lung sections were collected from ancestral

1 SARS-CoV-2 (**C**) or Beta variant (**D**) challenged hamsters. Views of the whole  
2 lung lobes (four independent sections) and the gross observations of lung  
3 tissues were presented in the top panel (scale bars, 2 mm), areas in the black  
4 box were enlarged in the bottom panel (scale bars, 200  $\mu$ m). Uncorrected  
5 Kruskal-Wallis tests were used for intergroup statistical comparison. Asterisks  
6 indicate statistical significance (\*\*\*\* $P < 0.0001$ ; \*\*\* $P < 0.001$ ; \*\* $P < 0.01$ ; \* $P <$   
7 0.05; ns, not significant).

8

1 **Table S1. Cryo-EM data collection, refinement and validation statistics of three-**  
2 **antibody immune-complexes**

|                                           | STFK:36H6:83H7:85F7 | STFK1628x:83H7:85F7:2B4 |
|-------------------------------------------|---------------------|-------------------------|
| <b>Data collection and processing</b>     |                     |                         |
| Microscope                                | FEI TF30            | FEI TF30                |
| Camera                                    | K3                  | K3                      |
| Magnification                             | 39,000              | 39,000                  |
| Voltage (kV)                              | 300                 | 300                     |
| Electron exposure (e-/Å <sup>2</sup> )    | 60                  | 60                      |
| Defocus range (µm)                        | 1.2-3.5             | 1.0-3.0                 |
| Pixel size (Å)                            | 0.778               | 0.778                   |
| Micrographs (total)                       | 3,479               | 4,191                   |
| Micrographs (used)                        | 2,576               | 3,773                   |
| Total particle                            | 1,146,590           | 1,684,307               |
| Final particle images (no.)               | 162,177             | 115,589                 |
| Symmetry imposed                          | C1                  | C1                      |
| Map resolution (Å)                        | 3.81                | 3.88                    |
| FSC threshold                             | 0.143               | 0.143                   |
| Map sharpening B factor (Å <sup>2</sup> ) | -142.4              | -119.8                  |
| <b>Validation</b>                         |                     |                         |
| MolProbity score                          | 1.96                | 1.99                    |
| Clashscore                                | 7.71                | 8.64                    |
| Poor rotamers (%)                         | 0.69                | 0.00                    |
| RMS (bonds)                               | 0.0113              | 0.0087                  |
| RMS (angles)                              | 1.36                | 1.32                    |
| Ramachadran plot                          |                     |                         |
| Favored (%)                               | 90.44               | 90.91                   |
| Allowed (%)                               | 9.44                | 8.97                    |
| Disallowed (%)                            | 0.12                | 0.12                    |

3  
4  
5  
6
